1 **CENP-B dynamics at centromeres is regulated by a SUMOylation/ubiquitination and**  
2 **proteasomal-dependent degradation mechanism involving the SUMO-targeted ubiquitin E3**  
3 **ligase RNF4**

4 Jhony El Maalouf <sup>1</sup>, Pascale Texier <sup>1,4</sup>, Indri Erliandri <sup>1,4</sup>, Camille Cohen <sup>1</sup>, Armelle Corpet <sup>1</sup>, Frédéric  
5 Catez <sup>2</sup>, Chris Boutell <sup>3</sup>, Patrick Lomonte <sup>1,\*</sup>

6

7 1. Univ Lyon, Université Claude Bernard Lyon 1, CNRS UMR 5310, INSERM U 1217, LabEx DEVweCAN,  
8 Institut NeuroMyoGène (INMG), team Chromatin Assembly, Nuclear Domains, Virus. F-69100, Lyon,  
9 France

10 2. Univ Lyon, Université Claude Bernard Lyon 1, CNRS UMR 5286, INSERM U 1052, Centre de  
11 Recherche en Cancérologie de Lyon. F-69000, Lyon, France

12 3. MRC-University of Glasgow Centre for Virus Research, Glasgow G61 1QH, Scotland (UK)

13 4. Contributed equally to this work.

14

15 \* Corresponding author: [patrick.lomonte@univ-lyon1.fr](mailto:patrick.lomonte@univ-lyon1.fr)

16

17

18 Running title: SUMO & ubiquitin-dependent CENP-B dynamics

19

20 Word count: 6743

21

22

23

24 The English of parts of this document has been checked by at least two professional editors, both native  
25 speakers of English. For a certificate, please see:

26

27 <http://www.textcheck.com/certificate/gh7EcX>

28

29

30

## 1 Abstract

2 Centromeric protein B (CENP-B) is a major constituent of the centromere. It is a DNA binding  
3 protein that recognizes a specific 17-nt sequence present in the centromeric alphoid satellite repeats.  
4 CENP-B importance for centromere stability has only been revealed recently. In addition to its DNA  
5 binding properties, CENP-B interacts with the histone H3 variant CENP-A and CENP-C. These  
6 interactions confer a mechanical strength to the kinetochore that enables accurate sister chromatids  
7 segregation to avoid aneuploidy. Therefore, understanding the mechanisms that regulate CENP-B  
8 stability at the centromere is a major unresolved issue for the comprehension of centromere function.  
9 In this study, we demonstrate that lysine K402 of CENP-B is a substrate for SUMO post-translational  
10 modifications. We show that K402 regulates CENP-B stability at centromeres through a  
11 SUMOylation/ubiquitination and proteasomal-dependent degradation mechanism involving the  
12 SUMO-Targeted Ubiquitin E3 Ligase RNF4/SNURF. Our study describes SUMOylation of CENP-B as a  
13 major post-translational modification involved in centromere dynamics.

14

## 15 Introduction

16 Since its discovery as one of the three major centromere-associated antigens recognized by  
17 autoimmune sera of patients with scleroderma (Earnshaw and Rothfield, 1985; Earnshaw et al.,  
18 1987a), centromeric protein B (CENP-B) has turned out to be a very complex and multifunctional  
19 protein. CENP-B is conserved among species from yeast to human, highlighting its functional  
20 importance, although not essential for mouse development until birth (Hudson et al., 1998; Kapoor  
21 et al., 1998; Perez-Castro et al., 1998). CENP-B exists as a homodimer that binds to DNA through a  
22 specific 17-bp motif (termed the CENP-B box) present in the alphoid repeated sequences constituting  
23 the DNA backbone of the centromere region of all human and mouse chromosomes, with the  
24 exception of the Y chromosome (Masumoto et al., 1989; Muro et al., 1992; Yoda et al., 1992; Kitagawa  
25 et al., 1995; Tawaramoto et al., 2003). Although not required for the maintenance of the mouse and  
26 Y chromosomes during cell divisions, CENP-B and the CENP-B box were shown to be essential for the  
27 *de novo* assembly of a functional centromere using artificial human chromosomes (Masumoto et al.,  
28 1998; Ohzeki et al., 2002). Accordingly, CENP-B knockout or depleted cells show a higher rate of  
29 chromosome mis-segregation and chromosomal instability (Fachinetti et al., 2015). In addition,  
30 CENP-B null mice show reproductive and developmental dysfunctions due to defects in the  
31 morphogenesis of the high *Cenpb*-gene expressing and highly mitotically active uterine epithelial  
32 tissues (Fowler et al., 2000; Fowler et al., 2004). At the molecular level, CENP-B accumulation at  
33 centromeres has been linked to its capacity to interact with the N-terminal tail of the centromere-  
34 specific histone H3 variant CENP-A (Fachinetti et al., 2013). The sustained upkeep of CENP-B at the  
35 centromere through its interaction with CENP-A contributes to the stability of chromosome  
36 segregation, conferring a major role to the CENP-B/CENP-A tandem as stabilizers of the kinetochore  
37 nucleation (Fachinetti et al., 2013). In addition, CENP-B also directly interacts with the C-terminal  
38 tail of CENP-C, an essential protein for kinetochore assembly that independently interacts with  
39 CENP-A, which contributes to the functional stabilization of the kinetochore (Fachinetti et al., 2015;  
40 Hoffmann et al., 2016).

41 Apart of an increased residence time at the centromere during the G1/S phase of the cell cycle,  
42 little is known about the dynamic regulation of CENP-B at the centromere (Hemmerich et al., 2008).  
43 In the present study we investigated the role of SUMO (Small Ubiquitin Modifier) modification on  
44 CENP-B stability at centromeres. We demonstrate that CENP-B could be SUMOylated *in vitro* on  
45 several lysine (K) residues, with K402 being the major SUMO modified residue. CENP-B K402  
46 modification influenced CENP-B turnover at centromeres through a proteasome-dependent

1 degradation mechanism involving the SUMO-Targeted Ubiquitin Ligase (STUbL) RNF4/SNURF  
2 (hereafter called RNF4).

## 3 4 5 Results

### 6 *CENP-B is SUMOylated in vitro and in vivo*

7 Recently published SUMO'omics studies detected CENP-B as a potential substrate for SUMOs  
8 modifications (Bruderer et al., 2011; Hendriks et al., 2015; Sloan et al., 2015). This implies that CENP-  
9 B post-translational modifications by SUMO can have a major role in the regulation of CENP-B  
10 dynamics at centromeres, and consequently on the centromeres activity itself. To detect lysine  
11 residues present in putative SUMOylation consensus sites we analyzed *in silico* the human CENP-B  
12 sequence using the JASSA (Joint Analyzer of SUMOylation Site and SIMs) software (Beauchair et al.,  
13 2015). Four potential SUMOylation sites were found, three of which (K28, K58, K76) associated with  
14 the N-terminal DNA binding (DBD) domain and one (K402) present in the core of the protein (Fig.  
15 1A). To determine if any of the 4 K residues were acceptor sites for CENP-B SUMOylation, point  
16 mutations were introduced in the CENP-B nucleotide sequence to produce CENP-B proteins mutated  
17 on each K individually or in combination (Fig. 1B). We did not use the usual modification K>R but  
18 rather K>G (or P) because due to the high GC content of the CENP-B nucleotide sequence (over 65%)  
19 some SUMOylation site-associated Ks were not in a proper environment to design oligonucleotides  
20 suitable to perform K>R site mutagenesis. *In vitro* SUMOylation assays showed that CENP-Bwt and  
21 CENP-B\_3K were SUMOylated to comparable levels to that of the positive control promyelocytic  
22 leukemia (PML) protein (Fig. 1C, compare lanes 4, 6, and 10). In contrast, CENP-B\_4K had a  
23 significantly reduced SUMOylation pattern (Fig. 1C, lane 8). This result confirms that CENP-B can be  
24 SUMOylated and demonstrates that K402 is the main SUMOylated lysine. Quantitation of unmodified  
25 forms of CENP-Bwt and CENP-B\_3K using the LI-COR Infrared Fluorescent Imaging System suggested  
26 that other K in the DBD could be SUMO modified (Fig. S1A). We performed additional assays using a  
27 CENP-B protein deleted of the first 129 aa constituting the DBD domain (CENP-B $\Delta$ DBD; (Yoda et al.,  
28 1992; Tanaka et al., 2005b) or the same protein with the additional mutation of K402 (CENP-  
29 B $\Delta$ DBD\_K402G) (Fig. 1D and S1B). Compared to CENP-Bwt, CENP-B $\Delta$ DBD SUMO signal was  
30 substantially decreased (compare lanes 2 and 6), and CENP-B $\Delta$ DBD\_K402G lost almost the entire  
31 SUMOylation signal (compare lanes 2 and 4). This confirms that although K402 contributes for the  
32 majority of the CENP-B SUMO signal, several lysine residues in the DBD are probably also substrates  
33 for SUMO modifications. To demonstrate that CENP-B could be covalently linked to SUMO *in vivo*, we  
34 performed denaturing HIS-pull down assays from cells ectopically expressing CENP-Bwt and 6xHIS-  
35 tagged SUMO-1. Although the HA tag has, on its own and unspecifically, an affinity for the Ni-NTA  
36 agarose resin, the result clearly showed that a high molecular weight extra CENP-B band was  
37 reproducibly detected when CENP-B was co-expressed with 6xHIS-SUMO-1 (Fig. 1E). This result  
38 indicates that CENP-B could be covalently linked to SUMO in cells, although this is likely to represent  
39 a minute part of the CENP-B protein. Altogether, these data demonstrate that CENP-B is a substrate  
40 for SUMOylation, which validates the previously published SUMO'omics data.

### 41 42 *SUMO pathway but not K402 is essential for CENP-B targeting to the centromere*

43 A previous study showed the exchange of CENP-B at centromeres to be highly dynamic during  
44 the G1-S phases of the cell cycle (Hemmerich et al., 2008). To determine if SUMOylation was involved  
45 in CENP-B targeting to centromeres, we analyzed the accumulation of ectopically expressed HA-  
46 CENP-Bwt at centromeres in cells depleted of Ubc9, the only known mammalian E2 SUMO

1 conjugating enzyme, by RNA interference (Fig. 2A and B). Depletion of Ubc9 did not affect HA-CENP-  
2 B expression (Fig. 2A), but significantly influenced its targeting to centromeres in cells showing a  
3 positive signal for HA-CENP-B ( $32.3 \pm 7.2\%$ ,  $30.2 \pm 6.5\%$  vs  $16.3 \pm 2.8\%$  in Ctl (nosiRNA), siCtl and  
4 siUbc9 treated cells, respectively) (Fig. 2B). These data suggest that Ubc9 activity, and hence a  
5 functional SUMOylation pathway, is required to target CENP-B to centromeres. To determine if K402  
6 was involved in the targeting of CENP-B to centromeres, CENP-Bwt or CENP-B\_K402G were  
7 ectopically expressed in HeLa cells. Co-localization with CENP-A of exogenous CENP-B wt and CENP-  
8 B\_K402G was analyzed by immunocytochemistry. No major changes in CENP-B targeting at  
9 centromere was detected (Fig. 2Ci and ii). Only the CENP-B $\Delta$ DBD showed a complete absence of  
10 CENP-B at centromeres (Fig. 2Ciii), as expected from previous studies (Pluta et al., 1992) and  
11 seemingly easily explained by its inability to bind to CENP-B boxes. However, and strikingly, the  
12 additional mutation of K402 in the CENP-B $\Delta$ DBD background restored to some extent a CENP-B  
13 centromeric signal (Fig. 2Civ and Fig. 3Bv). Endogenous CENP-B is present in HeLa cells, potentially  
14 interacting with the ectopic CENP-B through the C-terminal dimerization domain and introducing a  
15 bias of targeting. To avoid any misinterpretation due to dimerization with endogenous CENP-B, we  
16 performed similar experiments in mouse embryonic fibroblasts (MEF) isolated from CENP-B knock  
17 out mice in which both CENP-B alleles have been inactivated (MEF CENP-B $^{-/-}$ ) (Kapoor et al., 1998;  
18 Okada et al., 2007). Although the ectopic CENP-B is of human origin its non-mutated form was  
19 accurately targeted to mouse centromeres (Fig. 2Cv and Table 1). Mutation of K402 alone did not  
20 modify the targeting of CENP-B to centromeres compared to the CENP-Bwt. Consistently, a slight  
21 increase of the CENP-B\_K402G signal at centromere was observed (Fig. 2Cvi and Table 1). Like in  
22 HeLa cells the CENP-B $\Delta$ DBD was completely diffuse in the nucleoplasm with no co-localization with  
23 centromeres (Fig. 2Cvii and Table 1). Unlike in HeLa cells the CENP-B $\Delta$ DBD\_K402G showed the same  
24 pattern as CENP-B $\Delta$ DBD with no accumulation of CENP-B $\Delta$ DBD\_K402G signal at centromeres (Fig.  
25 2Cviii and Table 1). These data suggest that although K402 is not involved in the targeting of CENP-  
26 B to centromeres, it could potentially impact on the CENP-B residence time.

27

### 28 *Proteasome inhibition and mutation of K402 induces CENP-B accumulation at centromeres*

29 The major contribution of CENP-B K402 in CENP-B SUMOylation *in vitro* suggests a specific  
30 implication of K402 in CENP-B dynamics. Lysine SUMOylation has been shown to influence protein  
31 stability through SUMO targeted ubiquitination and proteasomal-degradation (Tatham et al., 2008).  
32 To determine if CENP-B SUMOylation influenced its stability at centromeres the accumulation of  
33 ectopically expressed CENP-Bwt, CENP-B $\Delta$ DBD, and CENP-B $\Delta$ DBD\_K402G were measured in HeLa  
34 cells in the presence or not of the proteasome inhibitor MG132 (Fig. 3A). In the presence of MG132,  
35 CENP-Bwt showed a clear aggregation pattern with most of the CENP-B signal co-localized with or  
36 juxtaposed to centromeres. Some CENP-B aggregates were also visible not-colocalizing with  
37 centromeres possibly highlighting neo-synthesized CENP-B not incorporated in centromeres and not  
38 degraded (Fig. 3Bi and ii left). Overall, the addition of MG132 led to an increase in the average size of  
39 CENP-B spots (Fig. 3Bi and ii middle (ROI)) represented by a number of pixels/spot that shifted  
40 towards higher values (Fig. 3B up-right). CENP-B $\Delta$ DBD and CENP-B $\Delta$ DBD\_K402G lack the DBD  
41 domain and are not able to bind the CENP-B boxes of the alphoid sequences. Accordingly, no CENP-  
42 A co-localization was observed with the diffuse CENP-B $\Delta$ DBD nucleoplasmic signal in the absence of  
43 MG132 (Fig. 3Biii left, and middle). The addition of MG132 partially restored CENP-B $\Delta$ DBD co-  
44 localization with CENP-A (Fig. 3Biv left, and middle (ROI)) and enabled the detection of spots with  
45 low values of pixels/spot (Fig. 3B middle-right). Strikingly, the sole mutation of K402 within the  
46 CENP-B $\Delta$ DBD background was enough to partially restore CENP-B signal at centromeres, a

1 phenotype that was amplified in the presence of MG132 (Fig. 3Bv and vi left, and middle (ROI)).  
2 Similarly to CENP-Bwt, the number of pixels/spot shifted towards higher values in the presence of  
3 MG132 (Fig. 3B down-right). Ectopically expressed CENP-Bwt showed very large aggregates in the  
4 presence of MG132 most of them co-localized/juxtaposed to CENP-A signal. The enlargement of the  
5 CENP-B signal could be due to its oligomerization and/or to a modification of the shape of the CENP-  
6 B box containing, but CENP-A deficient, centromere regions not necessarily detectable by the sole  
7 labeling of CENP-A. To verify the latter, immuno-FISH was performed to detect CENP-B and  
8 centromeres using a probe labelling as many centromere sequences as possible (Fig. 3C). Data  
9 showed that the size of the signal labelled by the probe was not enlarged in cells expressing ectopic  
10 CENP-Bwt and treated with MG132. This result does not favor an unwinding of the centromere  
11 regions due to the presence of undegraded CENP-B. Overall, the results show that proteasome  
12 inhibition induces the aggregation of CENP-B at or in the immediate vicinity of centromeres, which  
13 highly suggests a control of CENP-B stability by the proteasome with the contribution of K402.

14 CENP-B $\Delta$ DBD, and CENP-B $\Delta$ DBD\_K402G lose their capacity to bind to the CENP-B boxes  
15 present in the alphoid sequences. However, the C-terminal region of CENP-B is involved in its  
16 dimerization at the centromeres. Therefore, CENP-B $\Delta$ DBD, and CENP-B $\Delta$ DBD\_K402G could be  
17 retained at the centromeres in a stochastic manner through the interaction with endogenous CENP-  
18 B in HeLa cells. If the process of degradation of the mutated CENP-B is faster than its residence time,  
19 the centromeric accumulation of the protein by the sole interaction through its C-terminal domain is  
20 likely to be too weak to be visualized. In agreement with this hypothesis, CENP-B $\Delta$ DBD was only  
21 visualized localizing with centromeres in cells treated with the proteasome inhibitor MG132  
22 (compare Fig. 3Biii and iv). The detection of CENP-B $\Delta$ DBD\_K402G at centromeres, even in the  
23 absence of MG132 treatment, suggests that K402 could be involved in the turnover of CENP-B at  
24 centromeres in a proteasome-dependent manner. If so, the exchange rate of CENP-B $\Delta$ DBD\_K402G at  
25 centromeres would be expected to decrease in comparison to wild-type CENP-B. To test this  
26 hypothesis, we performed fluorescent recovery after photobleaching (FRAP) experiments using GFP-  
27 CENP-Bwt and GFP-CENP-B\_K402G (Fig. 3D). Both GFP-fused proteins were correctly targeted to  
28 centromeres (Fig. S2Ai and ii). Spots of GFP-CENP-B were bleached and recovery of the signals was  
29 measured at time points where CENP-B showed its highest rate of mobility (Hemmerich et al., 2008).  
30 Data were obtained from at least 4 independent experiments representing over 50 centromeres. The  
31 mutation of K402 reduced the recovery of CENP-B at centromeres, indicating that mutated CENP-B  
32 had a longer residency time at centromeres. This implied a role of K402 in the exchange rate of CENP-  
33 B. Accordingly, CENP-B proteins unable to bind to the CENP-B box, and hence poorly targeted to  
34 centromeres, would be expected to have similar dynamics. Accordingly, FRAP analysis of GFP- CENP-  
35 B $\Delta$ DBD and GFP- CENP-B $\Delta$ DBD\_K402G demonstrated that these two mutants had similar levels of  
36 mobility (Fig. S2Aiii and iv, and S2B). These data indicate that K402 is indeed implicated in the  
37 dynamics of CENP-B localized at centromeres.

38

### 39 *Proteasome inhibition or K402 mutation induce SUMO and ubiquitin accumulation at centromeres*

40 The above data demonstrate that both proteasome activity and K402 mutation influence  
41 CENP-B turnover at centromeres. This could simply suggest that CENP-B stability depends on K402  
42 ubiquitination. However, our *in vitro* data showed that K402 takes a major part in the SUMOylation  
43 of CENP-B (Fig. 1C and D), suggesting a combined role for SUMOylation and ubiquitination in the  
44 regulation of CENP-B stability at centromeres (Fig. 4A). If true, then SUMO and ubiquitin signals  
45 should accumulate at centromeres in the presence of CENP-B following proteasome inhibition.  
46 Treatment of cells with MG132 showed an increase in SUMO-1 and SUMO-2/3 signals at centromeres

1 in a subset of cells (approximately 10% of interphase cells) (Fig. 4Bi to vi). Ectopically expressed  
2 CENP-Bwt, CENP-B $\Delta$ DBD, and CENP-B $\Delta$ DBD\_K402G co-localized with SUMO-1 at centromeres in  
3 MG132-treated (Fig. 4Cii, iv, vi), but not untreated (Fig. 4Ci, iii, v) cells. Similar data were obtained  
4 with SUMO-2/3 (Fig. S3). Co-localization of ubiquitin together with CENP-Bwt, CENP-B $\Delta$ DBD, and  
5 CENP-B $\Delta$ DBD\_K402G was also observed at centromeres in MG132-treated cells (Fig. 4D). The  
6 remaining accumulation of SUMOs and ubiquitin at centromeres with the CENP-B $\Delta$ DBD\_K402G that  
7 lacks the four lysines initially determined as present in a strong SUMO consensus site is not  
8 unexpected for at least three reasons: (i) other K present in the CENP-B sequence could be the target  
9 of SUMOylation (Bruderer et al., 2011; Hendriks et al., 2015; Sloan et al., 2015); (ii) CENP-Bwt and  
10 its mutants could interact with protein that are themselves SUMOylated and/or ubiquitinated; and  
11 (iii) because of the presence of endogenous CENP-B and its capacity to dimerize with the ectopic  
12 CENP-B it could not be excluded that a subset of endogenous SUMOylated and/or ubiquitinated  
13 CENP-B accumulates at centromeres in those conditions. To confirm that SUMO and ubiquitin  
14 accumulation at centromeres was directly linked to the accumulation of ectopic CENP-B at  
15 centromeres following proteasome inhibition, and not a consequence of the treatment or of the  
16 presence of endogenous CENP-B, MEF CENP-B<sup>-/-</sup> cells were transfected to express CENP-Bwt, CENP-  
17 B $\Delta$ DBD, or CENP-B $\Delta$ DBD\_K402G under MG132 treatment or not. CENP-Bwt was readily observed to  
18 accumulate at centromeres in treated and untreated cells (Fig. S4Ai and ii). Like in HeLa cells,  
19 colocalization with SUMO-1 (Fig. 4Ei and ii), SUMO-2/3 (Fig. S4Bi and ii) and ubiquitin (Fig. S4Ci and  
20 ii) was only observed following MG132 treatment. In contrast, CENP-B $\Delta$ DBD and CENP-  
21 B $\Delta$ DBD\_K402G, which, unlike in HeLa cells, fail to accumulate at centromeres irrespective of the  
22 MG132 treatment (Fig. S4Aiii to vi), did not induce the characteristic spotty pattern of centromeric  
23 accumulation of SUMO-1 (Fig. 4Eiii to vi), SUMO-2/3 (Fig. S4Biii to vi), and ubiquitin (Fig. S4Ciii to  
24 vi). These data demonstrate that SUMO and ubiquitin conjugates stably accumulate at centromeres  
25 concomitantly with the recruitment of CENP-B and only if the proteasome is inactive, suggesting that  
26 both SUMOylation and ubiquitination contribute to the dynamics of CENP-B at centromeres.

27

### 28 *RNF4 STUbL activity regulates CENP-B accumulation at centromeres*

29 RNF4 is an E3 ubiquitin ligase with SUMO-targeting properties that regulates the stability of  
30 many SUMO-modified substrates (Tatham et al., 2008). As the stability of CENP-B at centromeres was  
31 influenced in both SUMO- and ubiquitination-dependent manner, we investigated the potential role  
32 of RNF4 in the turnover of CENP-B at centromeres. Over-expression of RNF4 induced the depletion  
33 of CENP-B from centromeres in a subset of cells ( $48.7 \pm 3.2$  %, 400 cells counted over five  
34 experiments) (Fig. 5Ai and ii; Fig. 5B), but not CENP-A (Fig 5Av), in a manner that was dependent on  
35 the catalytic activity of the RING-finger domain of RNF4 (RNF4<sub>DN</sub>) ( $3.5 \pm 3.3$  %,  $p = 1.6 \cdot 10^{-6}$ ) (Fig. 5Aiii  
36 and iv; Fig 5B). Interestingly, mutation of the RNF4 RING-domain also increased the number of spots  
37 of RNF4 co-localizing with CENP-B or CENP-A at centromeres (Fig 5Avi and vii). Co-transfection of  
38 SUMO-1 or SUMO-2 with RNF4wt induced a small but statistically significant increase in cells  
39 showing CENP-B depletion ( $55.8 \pm 5.6$  %;  $p = 0.043$  for SUMO-1, and  $54.2 \pm 5.5$  %,  $p = 0.05$  for SUMO-  
40 2; 500 cells counted over 4 experiments) (Fig. 5B), which suggested a role of SUMOylation in addition  
41 to RNF4 in the control of CENP-B stability at centromeres. Co-immunoprecipitation assays using  
42 ectopically expressed proteins highlighted an interaction between CENP-B and RNF4 (Fig. 5C). The  
43 interaction was likely dependent on SUMOylation because the addition of the SUMO proteases  
44 inhibitor N-ethylmaleimide (NEM) was required to maintain this interaction whenever RNF4 (Fig.  
45 5D, two upper gels compare lanes 4 and 5, and 6 and 7) or CENP-B (Fig 5E, upper gel, compare lanes  
46 4 and 5, and 6 and 7) was immunoprecipitated. Addition of NEM also enabled the detection of high

1 molecular weight (HMW) signals detected by the FLAG antibody (Fig. 5D, long exposure membrane).  
2 Stripping and reprobing the membranes enabled the detection of SUMOs (Fig. 5D and 5E, two middle  
3 gels) and ubiquitin (Fig. 5D, lower gel) moieties. This indicated the likelihood of SUMOs and  
4 ubiquitin-modified CENP-B co-IPed with RNF4, although we cannot rule out the possibility of a  
5 contribution of other SUMOylated and ubiquitinated proteins than CENP-B and associated with RNF4  
6 to the high MW signals observed. Co-IPs performed in RNF4<sub>DN</sub> expressing cells showed a reduced  
7 ubiquitin signal although SUMO signals remained unchanged, which confirmed the reduced  
8 ubiquitination activity of RNF4<sub>DN</sub>, accounting for the lack of effect of RNF4<sub>DN</sub> on CENP-B stability at  
9 centromeres. The amount of putatively SUMO and ubiquitin modified CENP-B co-IPed with RNF4  
10 represented a minute part of the total amount of CENP-B, which may reflect the low amount of CENP-  
11 B harboring such modifications in those experimental conditions. WBs performed in cells co-  
12 expressing ectopic CENP-B and either RNF4 or RNF4<sub>DN</sub> showed that RNF4 induced a slight but  
13 reproducible decrease of CENP-B that was not observed with RNF4<sub>DN</sub>, suggesting an RNF4-induced  
14 and ubiquitin/proteasome-dependent CENP-B degradation (Fig. 5F, up and middle for  
15 quantifications). RT-qPCR analyses ruled out any misinterpretation due to a decrease of the FLAG-  
16 CENP-B mRNA (Fig. 5F, down).

17 If RNF4 is involved in the turnover of CENP-B at centromeres then it should incrementally  
18 take part in the depletion of CENP-B from the centromeres whenever the CENP-B protein amount is  
19 artificially reduced for example by siRNA (Fig. 6A for the synopsis of the experiment). Transfection  
20 of a CENP-B-specific siRNA significantly decreased the amount of CENP-B at centromeres in contrast  
21 to RNF4-specific siRNA (Fig. 6Bii and iii, and C lanes 3 and 4). Co-transfection of CENP-B and RNF4  
22 siRNAs restored the signal and amount of CENP-B at centromeres (Fig. 6Biv and C lane 5). This was  
23 not indirectly due to a differential depletion of the CENP-B mRNA because RT-qPCR did not detect  
24 any significant difference in CENP-B mRNA amount when CENP-B siRNA was used alone or together  
25 with the RNF4 siRNA (Fig. 6D, data normalized on the actin housekeeping gene). If CENP-B stability  
26 is dependent on a SUMOylation/ubiquitination pathway, then E3 SUMO ligases should be involved in  
27 that process. Protein inhibitor of activated STATs (PIASs) proteins are known for their SUMOylation  
28 activity (Johnson and Gupta, 2001) and have been connected to the centromere activity in yeasts  
29 and/or mammalian cells (Azuma et al., 2005; Dasso, 2008; Rytinki et al., 2009; Xhemalce et al., 2004).  
30 We then performed similar experiment than above but this time by co-depleting PIAS1, 2, and 4  
31 proteins together with CENP-B (Fig. 7A for the synopsis of the experiment). Similarly to the above  
32 results, the inactivation of the PIASs together with CENP-B restored the CENP-B signal at  
33 centromeres (Fig. 7Biv and C compare lanes 4 and 5). Altogether, these data demonstrated that RNF4  
34 acted as a SUMO-targeted ubiquitin ligase (STUbL) controlling CENP-B stability through a  
35 SUMOylation/ubiquitination and proteasome degradation process involving PIAS proteins.

36  
37

## 38 Discussion

39 Centromeres are major chromosome domains essential for the development and survival of  
40 all eukaryotes, from yeast to mammals. Yet, their structure and regulation remain largely unknown,  
41 in part, due to their complexity. Centromeric DNA is composed of repetitive satellite DNA arrays  
42 (called alphoid DNA in humans), themselves forming higher order repeats, which in humans varies  
43 from one chromosome to another, making them difficult to experimentally analyze. At the  
44 nucleoprotein level, centromeres are packaged into chromatin incorporating a specialized histone  
45 variant (CENP-A). In addition, the presence of a set of histone modifications defines the so-called  
46 "centrochromatin." During interphase, tens of proteins interconnect to form the platform that

1 enables the formation of the kinetochore structure to which microtubules attach during mitosis.

2 CENP-B is one of the first proteins described as a major constituent of the centromere present  
3 during the entire cell cycle (Earnshaw and Rothfield, 1985; Earnshaw et al., 1987a; Earnshaw et al.,  
4 1987b). CENP-B is a conserved protein in all eukaryotes, which suggests a major role in intra- and  
5 inter-species evolution. Despite this, it is understudied partly because previous studies showed that  
6 it was not necessary for mouse development, at least until birth (Hudson et al., 1998; Kapoor et al.,  
7 1998; Perez-Castro et al., 1998). CENP-B is required for de novo assembly of centromeres with CENP-  
8 A-containing chromatin, which confers to CENP-B, at least in some specific contexts, an essential role  
9 in the formation of functional centromeres (Okada et al., 2007). In its absence, a higher rate of  
10 chromosome mis-segregation is observed in both human and mouse cells, and in fibroblasts from  
11 CENP-B null mice, which suggests a conserved role for CENP-B in maintaining chromosomal  
12 instability at low levels, preventing aneuploidy and tumorigenesis (Fachinetti et al., 2015, Morozov  
13 et al., 2017). A recent study demonstrated the requirement of CENP-B for faithful chromosome  
14 segregation following CENP-A depletion from kinetochores, suggesting a major role for CENP-B in  
15 maintaining centromere strength during mitosis (Hoffmann et al., 2016). In addition, uncontrolled  
16 CENP-B binding to ectopically integrated alphoid DNA promotes both the addition of the H3K9me3  
17 heterochromatin marker and DNA methylation, which were shown to antagonize the formation of  
18 CENP-A chromatin (Nakashima et al., 2005; Okada et al., 2007; Okamoto et al., 2007).

19 In the present study, we demonstrated that CENP-B can be SUMOylated, and that SUMOylation  
20 plays a major role in its dynamics at centromeres. Our *in vitro* data show K402 as a major contributor  
21 to the SUMOylation of CENP-B. K402 is not required for the targeting of CENP-B to centromeres  
22 because its mutation does not affect the accumulation of CENP-B at centromeres. Intriguingly, in the  
23 context of the inability of CENP-B protein to bind the CENP-B box due to the deletion of its DBD, and  
24 thus to accumulate at centromeres (Pluta et al., 1992), K402 mutation and/or inhibition of  
25 proteasome activity partially restored the capacity of CENP-B $\Delta$ DBD to accumulate at centromeres.  
26 These data suggested a role for K402 in the combined SUMO/ubiquitin/proteasome-dependent  
27 turnover of CENP-B at centromeres. Our FRAP data indeed showed that K402 mutation affected the  
28 mobility of centromere-associated CENP-B, unlike nucleoplasmic CENP-B, and was therefore  
29 implicated in CENP-B dynamics at centromeres.

30 A previous study showed that during interphase, CENPs could be exchanged at the  
31 centromeres, revealing unexpectedly complex and dynamic changes within the centromere  
32 throughout cell cycle progression (Hemmerich et al., 2008). Two different CENP-B populations were  
33 described with drastically different centromere residence times based on the G1/S or G2 cell cycle  
34 stages. During the former, CENP-B is very dynamic with a rapid exchange rate, whereas in G2 CENP-  
35 B is stably bound to the centromere. If CENP-B K402-dependent centromeric turnover is linked to  
36 the process of SUMOylation/ubiquitination and proteasome degradation, then both SUMOs and  
37 ubiquitin should be detected at centromeres in some specific experimental conditions. This was  
38 indeed the case for SUMOs in a subset of cells in interphase when MG132 treatment was applied for  
39 a short period of time. This was much more obvious when MG132 was applied to cells ectopically  
40 expressing CENP-Bwt, CENP-B $\Delta$ DBD, or CENP-B $\Delta$ DBD\_K402G, bypassing the steady-state regulation  
41 of centromeric CENP-B. The fact that CENP-B $\Delta$ DBD\_K402G still induced the accumulation of SUMOs  
42 and ubiquitin at centromeres, although at least four of its SUMOylable lysines were missing,  
43 suggested that (i) it could be due to the modification of endogenous CENP-B; (ii) other lysines in  
44 CENP-B may be the sites of SUMOylation (see Supplementary Data in Hendriks et al., 2015) on CENP-  
45 B K70 SUMOylation); (iii) the accumulation of CENP-B at centromeres induces the SUMOylation and  
46 ubiquitination of other centromeric proteins. The use of CENP-B\_4K and CENP-B $\Delta$ DBD\_K402G in our



1 *in vitro* experiments showed that although the SUMOylation of CENP-B was greatly diminished in  
2 both proteins, some SUMOylation remained, suggesting the possibility of other SUMOylable lysines,  
3 at least *in vitro*. The expression of CENP- $\Delta$ DDBD and CENP- $\Delta$ DDBD\_K402G, unlike CENP-Bwt in MEF  
4 CENP-B<sup>-/-</sup> cells, did not induce the accumulation of SUMOs or ubiquitin at centromeres in cells treated  
5 with MG132. These results demonstrate that there exists a direct correlation between the capacity of  
6 CENP-B to accumulate at centromeres and the accumulation of SUMOs and ubiquitin, supporting the  
7 likelihood of a direct modification of CENP-B by both SUMOs and ubiquitin. This finding highlighted  
8 an unanticipated additional level in the complexity of the regulation of interphase centromere  
9 dynamics through the control of CENP-B stability by SUMOylation/ubiquitination and proteasomal  
10 degradation. That the CENP-B stability could be controlled by a process of  
11 SUMOylation/ubiquitination is not unexpected as we previously described that a viral SUMO-  
12 targeted ubiquitin ligase (STUbL), namely ICP0 of herpes simplex virus 1, is capable of inducing the  
13 proteasomal degradation of several centromeric proteins including CENP-B (Everett et al., 1999;  
14 Lomonte et al., 2000; Lomonte and Morency, 2007; Gross et al., 2012). In addition, a recent study  
15 suggested that the integrity of centromeres chromatin could be maintained by the deposition of  
16 histones through a CENP-B SUMO-dependent interaction with the histone H3.3 chaperone DAXX  
17 (Morozov et al., 2017).

18 We found that RNF4 and the E3 SUMO ligases, PIASs, cooperate to maintain the CENP-B level  
19 at centromeres. RNF4 alone, when over-expressed, was able to deplete CENP-B from centromeres,  
20 which suggests a role for this STUbL as an E3 ubiquitin ligase involved in the proteasomal  
21 degradation of CENP-B. Given the propensity of CENP-B to be SUMOylated *in vitro* and *in vivo*, and  
22 the CENP-B-dependent accumulation of SUMOs at centromeres in proteasome inhibitor-treated cells,  
23 we inferred that E3 SUMO ligases could also be involved. SUMO in general and PIASs in particular  
24 play critical roles during mitosis (Dasso, 2008). We show that simultaneous inactivation of PIAS1,  
25 2(x), and 4(y) significantly reduced siRNA-induced CENP-B depletion. The requirement for the  
26 simultaneous inactivation of 3 PIASs to observe an effect on the reversion of CENP-B depletion is  
27 most likely due to redundant PIAS activities. Indeed, PIAS4(y)<sup>-/-</sup> mice are viable, fertile, and  
28 morphologically normal (Roth et al., 2004), suggesting that other PIASs may compensate for the lack  
29 of PIAS4(y). Moreover, mutations in yeast genes encoding SUMO ligases do not lead to strong mitotic  
30 phenotypes, suggesting that E3 enzymes function redundantly for key substrates (Dasso, 2008). Still,  
31 the accumulation of SUMOs at centromeres during the cell cycle is hardly detectable in mammalian  
32 cells. This could be potentially explained by the presence of SUMO proteases that, in a very dynamic  
33 process, could deSUMOylate substrates to maintain them in a non-SUMOylated form compatible with  
34 their stability and activity. In mammalian cells, SUMOylated CENP-I and HP1 $\alpha$  are substrates for the  
35 SUMO proteases SENP6 and -7, respectively (Mukhopadhyay et al.; 2010Maison et al., 2012).

36 All these data are summarized in a working model outlined in Figure 7D. Briefly, following its  
37 synthesis, CENP-B is targeted to centromeres where it accumulates. Excess centromeric CENP-B  
38 would then be controlled by a SUMOylation/ubiquitination and proteasomal degradation pathway;  
39 CENP-B K402 is the keystone of this process. K402 SUMOylation could be induced by PIASs, further  
40 activating RNF4. RNF4 then induces the ubiquitination of SUMOylated CENP-B, which signals for its  
41 proteasomal degradation. SUMO proteases could then be involved in deSUMOylation of CENP-B K402  
42 to maintain the balance of CENP-B at centromeres.

43 Both recent and older studies revealed essential CENP-B structural and functional roles at  
44 centromeres in the initial formation of a functional locus, as well as their long-term activity in the  
45 maintenance of genome stability (Ohzeki et al., 2002; Okada et al., 2007; Fachinetti et al., 2015;  
46 Hoffmann et al., 2016). CENP-B acts at the epigenetic level by inducing heterochromatin markers,

1 such as trimethylation of H3K9 (H3K9me3) and CpG methylation (Okada et al., 2007). A mix of  
2 euchromatin- and heterochromatin-associated histone markers were described as part of  
3 centromere chromatin (Sullivan and Karpen, 2004; Schueler and Sullivan, 2006; Nakano et al., 2008;  
4 Mravinac et al., 2009; Stimpson and Sullivan, 2011; Ohzeki et al., 2012; Bergmann et al., 2012;  
5 Erliandri et al., 2014). It was suggested that the balance between these markers must be tightly  
6 controlled to maintain a chromatin landscape compatible with centromere activity (Nakano et al.,  
7 2008). A dual role for CENP-B in centromeric satellite DNA chromatin marker acquisition has been  
8 suggested, with CENP-B involved in both CENP-A and H3K9me3 chromatin assembly (Okada et al.,  
9 2007; Fachinetti et al., 2015; Morozov et al., 2017). It was shown that a reduction in CENP-A  
10 chromatin assembly directly correlates with high levels of H3K9me3 and CpG hypermethylation in  
11 alphoid DNA (Okada et al., 2007). Moreover, mouse and human centromeric satellite DNA possess  
12 distinctive clusters of CENP-A and H3K9me3 chromatin (Guenatri et al., 2004; Lam et al., 2006;  
13 Martens et al., 2005; Nakashima et al., 2005). These features led to the suggestion that CENP-B could  
14 be involved in the clustering of centromeric chromatin in major interspersed domains containing  
15 either CENP-A nucleosomes and no CpG methylation of centromeric satellite DNA or H3K9me3  
16 nucleosomes and CpG methylation (Okada et al., 2007). An additional impact of CENP-B on the  
17 regulation of the timing of replication of alphoid centromere sequences in association with specific  
18 histone modification markers has been proposed (Erliandri et al., 2014). The imbalance of the  
19 amount CENP-B in one region or another in the alphoid sequence may induce improper chromatin  
20 marker acquisition leading to the deregulation of centromere activity.

21 Among the three CpG potentially methylated sites found in alphoid DNA, two are located in  
22 the CENP-B box, and methylation of these sites prevents the binding of CENP-B, which suggests that  
23 CENP-B does not occupy all the available CENP-B boxes present in centromeric satellite arrays  
24 (Tanaka et al., 2005a; Okada et al., 2007). Additionally, Nap1, a histone chaperone involved in  
25 nucleosome assembly by promoting proper DNA binding of core and linker histones, inhibits the non-  
26 specific binding of CENP-B to alphoid DNA (Tachiwana et al., 2013). Indeed, CENP-B DBD is highly  
27 basic, which confers on CENP-B the propensity to non-specifically bind to the negatively charged DNA  
28 phosphate backbone, similar to histones. It thus makes sense that cellular mechanisms are required  
29 to “clean” centromeric chromatin from an excess of non-specifically bound CENP-B. Our study brings  
30 to light an additional mechanism involved in controlling the amount of CENP-B at the centromeres  
31 to maintain centromere function over cell generations. Any failure in that process could lead to  
32 centromere inactivation, mitotic defects, and associated genetic instabilities.

33

34

35 Materials and Methods

36

### 37 Cells and plasmids

38 HeLa (ATCC® CCL2™), MEF CENP-B<sup>+/+</sup> and CENP-B<sup>-/-</sup> cells were grown at 37°C in Glasgow Modified  
39 Eagle (GMEM) or DMEM medium complemented with 10% fetal bovine serum, L-Glutamin (1% v/v),  
40 10 units/ml of penicillin, 100 mg/ml of streptomycin. For MG132 treatments cells were incubated in  
41 medium containing 2.5 μM MG132 for five hours.

42

43 pcDNA-HA-CENP-B, pcDNA-HA-RNF4, p3X-FLAG-CENP-B, and p3X-FLAG-RNF4 plasmids were  
44 constructed by cloning in a pcDNA3.1-HA (LOMONTE et al., 2004) or p3X-FLAG (Sigma) vector, the  
45 CENP-B or the RNF4 cDNAs retrieved from a HeLa cDNA library.

1 CENP-B mutants, and RNF4<sub>DN</sub> (C132/135S)-expressing plasmids were obtained by site-directed  
2 mutagenesis using the QuickChange® kit (Agilent). CENP-B K28, K58, K76 and K402 were mutated  
3 in P28, G58, G76 and G402 respectively. Multiple lysine-mutated CENP-B sequences were obtained  
4 by sequential site-directed mutagenesis.

5 PET28b-6xHis-CENP-Bwt plasmid was first constructed by insertion of the CENP-Bwt ORF. PET28b-  
6 6xHis-CENP-B\_Kmut plasmids were then obtained either by sub-cloning from the pcDNA-CENP-  
7 B\_Kmut plasmids or by site-directed mutagenesis. PET28b-6xHis-FLAG-CENP-Bwt and pET28b-  
8 6xHis-FLAG-CENP-B\_Kmut plasmids were constructed by in frame insertion of a 69nt fragment  
9 containing the 3x-Flag and isolated from the p3xFLAG-CMV10 plasmid, between the 6xHis and the  
10 ATG of the CENP-Bwt and mutant ORFs or by sub-cloning. PET28b-6xHis-FLAG-PML was obtained  
11 by sub-cloning of PML cDNA in the pET28b-6xHis-FLAG vector.

12 pLVX-6xHis-SUMO-1 vector was kindly provided by Dr Ben Hale (Institute of Medical Virology,  
13 University of Zürich).

14 pEGFPC1-CENP-Bwt, pEGFPC1-CENP-B\_K402G, pEGFPC1- CENP-BΔDBD, pEGFPC1- CENP-  
15 BΔDBD\_K402G plasmids were obtained by a double digestion of the corresponding pcDNA-HA-  
16 CENP-B plasmids and subcloning of the fragments.

17 All plasmids were purified and verified by sequencing.

### 18 19 **HIS-tagged protein pull-down assays**

20 HeLa cells (2.4 x 10<sup>6</sup> cells/dish) were transfected with the appropriate plasmids. Twenty four hours  
21 post-transfection, cells were washed once with cold phosphate saline buffer (PBS) containing 20mM  
22 N-Methylmaleimide (NEM) before adding 4 mLs of denaturing sample buffer (6M GuHCL, 100mM  
23 Na<sub>2</sub>HPO<sub>4</sub>, 100mM NaH<sub>2</sub>PO<sub>4</sub>, 10mM Tris/HCl pH 8.0, 10mM imidazole, β-mercaptoethanol 5mM,  
24 benzonase 250U/mL). After 20min lysis on ice, the solution was sonicated using a probe-sonicator.  
25 The debris were pelleted and the supernatant was transferred in a new tube before adding 60 μl of  
26 Ni-NTA agarose resin (Quiagen) pre-equilibrated with denaturing sample buffer, and incubated by  
27 rotation for at least 16 hours at 4°C. Beads were spun out of suspension and the resin was transferred  
28 into a new tube. The resin was washed once with denaturing sample buffer, then twice with  
29 denaturing pH 8.0 wash buffer (8M urea, 100mM Na<sub>2</sub>HPO<sub>4</sub>, 100 mM NaH<sub>2</sub>PO<sub>4</sub>, 10mM Tris/HCl pH  
30 8.0, 10mM imidazole, β-mercaptoethanol 5mM), then twice with denaturing pH 6.3 wash buffer (8M  
31 urea, 100mM Na<sub>2</sub>HPO<sub>4</sub>, 100 mM NaH<sub>2</sub>PO<sub>4</sub>, 10mM Tris/HCl pH 6.3, 10mM imidazole, β-  
32 mercaptoethanol 5mM). Beads were resuspended in 60 μl of laemmli buffer before boiling for 2 min.

### 33 34 **Immunoprecipitation**

35 HeLa cells were seeded at 1.2 x 10<sup>6</sup> cells per 100 mm Petri dish. The following day, cells were  
36 transfected (Effectene Transfection Reagent; Qiagen) with the adequate plasmids. The following day  
37 cells were washed once with cold phosphate saline buffer (PBS) containing 20mM N-  
38 Methylmaleimide (NEM), scraped off the flask then centrifuged at 1000 X g for 5min. The cell pellet  
39 was resuspended in 200μl of a lysis buffer (15 mM Tris-HCl (pH 7.5), 2 mM EDTA, 0.25 mM EGTA, 15  
40 mM NaCl, 0.3 mM Sucrose, 0.5 % Triton X 100 (TX100), 300mM KCl, 20mM NEM). Samples were  
41 incubated on ice for 30 min, and centrifuged at 6000 X g for 5min at 4°C to remove all debris. Protease  
42 inhibitors phenylmethylsulfonyl fluoride (PMSF) and protease inhibitor cocktail tablets (Roche)  
43 were added to the lysis buffers. Cell extracts were incubated with the appropriate antibodies O/N at  
44 4°C. Then 50 μl of dynabeads protein G (Thermoscientific) pre-equilibrated in lysis buffer, were  
45 added to the samples and incubation was carried on for one hour. Samples were then centrifuged  
46 briefly and washed 5 times with lysis buffer before resuspending the beads in Laemmli buffer then

1 boiled.

2

### 3 **Western blotting and proteins quantifications**

4 Samples from immunoprecipitation and siRNA assays were treated for western blotting according to  
5 the protocol described in (Lomonte et al., 2000). Proteins were loaded on a SDS 4-15%  
6 polyacrylamide gradient gel, before running, transfer and detection. Quantification of proteins was  
7 performed using the Image Lab software associated with the ChemiDoc Imaging system (Biorad).

8

### 9 **SiRNA experiments.**

10 Cells were seeded at very low density before siRNAs transfections. Two rounds of siRNAs  
11 transfections (Effectene Transfection Reagent; Qiagen) were performed at 48 h intervals with the  
12 amounts of siRNAs adjusted to the number of cells following the manufacturer's protocol. Cells were  
13 then treated depending on the subsequent experiment to be performed (WB or IF). The siRNA  
14 sequences used were:

15 Control siRNA (siCtl) 5'-UACAGCUCUCUCGACCC-3' (Eurogentec); siRNF4: 5'-  
16 GAAUGGACGUCUCAUCGUU-3' (Galanty et al., 2012); PIAS1 siRNA (siPIAS1): 5'-  
17 GGAUCAUUCUAGAGCUUUA-3' (Galanty et al., 2012); PIAS2 siRNA (siPIAS2): 5'-  
18 AAGAUACUAAGCCCACAUUUG-3' {Yang:2005gf}; PIAS4 siRNA (siPIAS4): 5'-  
19 GGAGUAAGAGUGGACUGAA-3' (Galanty et al., 2012); UBC9 siRNA (siUbc9): 5'-  
20 GAAGUUUGCGCCUCAUAA-3' (Dharmacon, on target J-004910-06) (Pourcet et al., 2010; Rojas-  
21 Fernandez et al., 2014). All these siRNAs have been used in previous studies and analyzed for absence  
22 of off-target effects.

23

### 24 **Real time quantitative PCR (RT-qPCR)**

25 Detections and quantifications of FLAG-CENP-B, endogenous CENP-B, endogenous RNF4, and actin  
26 transcripts were performed using the QuantiTect SYBR Green RT-PCR kit (Qiagen) with the following  
27 primers: endoCENP-B fwd: GGGAGGCCATGGCTTACTTT; endoCENP-B rev: 5'-  
28 TTCCAAGTGGAGGATGTGGC-3'; RNF4 fwd: 5'-ACTCGTGGAACTGCTGGAG-3'; RNF4 rev: 5'-  
29 TCATCGTCACTGCTCACCAC-3'; FLAG fwd: 5'-CTACAAAGACCATGACGGTGA-3'; ectoCENP-B rev: 5'-  
30 GGATGATCCGTGACTTCTCCC-3'; actin fwd: 5'-CGGGAAATCGTGCGTGACATTAAG-3'; actin rev: 5'-  
31 GAACCGCTCATTGCCAATGGTGAT-3'. Data were normalized on the actin housekeeping gene.

32

### 33 **FRAP experiments**

34 Hela cells were plated in 27 mm diameter glass-bottom plastic petri dishes (Dominique Dutscher) at  
35 a concentration of  $5 \cdot 10^5$  cells/plate. Cells were transfected with plasmids coding for GFP, GFP-CENP-  
36 Bwt, GFP-CENP-B\_K402G, GFP- CENP-B $\Delta$ DBD, or GFP- CENP-B $\Delta$ DBD\_K402G using effectene reagent  
37 (Qiagen). Bleaching was performed with the 458, 488 and 514 nm lines of an argon laser (set to  
38 100%) and the 561 nm line of a DPS 561 laser. Five pre-bleach images were collected, followed with  
39 a 145 ms bleach pulse on a 3  $\mu$ m diameter spot. Images were collected every 393ms during 120 sec  
40 after simultaneous bleaching of two centromeres per nucleus. Images were acquired with the 488  
41 nm line of the argon laser (set to 1%). Loss of fluorescence due to acquisition was calculated using  
42 total fluorescence of the cell, and pre-bleach intensity as reference. Photobleaching did not exceed  
43 5%. Fluorescence intensity of centromeres was background subtracted, and corrected for  
44 photobleaching due to image acquisition. Fluorescence of each photo-bleached centromere was  
45 normalized to the fluorescence before bleaching. FRAP experiments were performed on a scanning  
46 confocal microscope LSM 780 (Carl Zeiss, Inc.).

47

## 1 **Fluorescent in situ hybridization (FISH)**

2 The protocol used was derived from Solovei et al. (Solovei et al., 2002). Cells were seeded at  $7.5 \times 10^4$   
3 cells per well in Millicell EZ SLIDE 8-well glass (Merck Millipore). Cells were fixed with PFA 2% for  
4 10min., washed twice with PBS, permeabilized for 5 min. with Triton X-100 0.5% in PBS, and then  
5 washed twice with 2 X SSC. DNA deproteination was performed by incubation of cells in HCl 0.1M for  
6 5 min. Cells were washed twice with 2X SSC, then incubated 2x10min in a solution 50%  
7 formamide/SSC 2X. Ten  $\mu$ l of a hybridization solution (10% dextran, 1X denhardt, 2X SSC, 50%  
8 formamide) containing 20 ng of probe (StarFISH human chromosome pan-centromeric paints biotin,  
9 Cambio, UK), were put in contact with the cells. Coverslips were sealed with "Rubber cement" until  
10 dried out. DNA denaturation of cells and probe was performed for 5min at 80°C, and hybridization  
11 was carried out overnight at 37°C.

12 Cells were washed 3x10min in 2X SSC and 3x10min in 0.2X SSC at 37°C then pre-incubated with  
13 4XSSC/5% milk for 30 min. Streptavidin labeled with Alexa-Fluor 488 diluted in 4X SSC/5% milk was  
14 added for 1 H RT. Cells were washed twice with 4X SSC, treated with TX-100 0.1%/2X SSC for 10min,  
15 then washed twice with 4X SSC, before staining the nuclei with Hoechst 33238 (Invitrogen). Slides  
16 were mounted using Vectashield mounting medium (Vector Laboratories) and stored at +4°C until  
17 observation.

## 18 **Immunofluorescence and immuno-FISH**

19 For immunofluorescence (IF), cells were seeded at  $7.5 \times 10^4$  cells per well in Millicell® EZ SLIDE 8-well  
20 glass (Merck Millipore). Cells were treated for IF as described in {Morency:2007bt}. For immuno-  
21 DNA FISH, cells were fixed with PFA 2% for 10min, washed twice with PBS, permeabilized for 5 min.  
22 with Triton X-100 0.5% in PBS then washed with PBS. Cells were incubated for 1 h with the primary  
23 antibody diluted in PBS containing 3% FBS. After 3 washes, the secondary antibody was applied for  
24 1 h at 1/200 dilution. Secondary antibodies were AlexaFluor conjugated (Invitrogen). Following  
25 immuno-staining, cells were post-fixed in PFA 1% for 5 min, and DNA-FISH was carried out as  
26 described above from the HCl step. Samples were examined either by confocal microscopy (Zeiss  
27 LSM 510) or using an inverted CellObserver (Zeiss), and a CoolSnap HQ2 camera from Molecular  
28 Dynamics (Ropper Scientific). The data were collected using an alpha Plan-APOCHROMAT 100x/1.46  
29 oil lens. Datasets were processed using LSM 510 software, and then by ImageJ software (Rasband,  
30 W.S., ImageJ, U.S., National Institutes of Health, Bethesda, Maryland, USA. <http://imagej.nih.gov/ij/>)  
31 and Adobe Photoshop.  
32

## 33 **Antibodies**

34 The following antibodies were used for this study: *mouse monoclonal* anti-6xHis (Clontech, 631212),  
35 anti-human CENP-A (Abcam, ab13939), anti-SUMO-1 (MBL, clone 5B12), anti-SUMO2/3 (MBL, clone  
36 1E7), anti-ubiquitin (Affinity, clone FK2), anti-CENP-B (generous gift from Hiroshi Masumoto (Japan),  
37 clone 5E6C1); *rat monoclonal* anti-HA (Roche, clone 3F10); *rabbit monoclonal* anti-SUMO-1 (Abcam,  
38 clone Y299), anti-SUMO-2/3 (Cell Signaling, clone 18H8), anti-PIAS1 (Abcam, ab109388); *rabbit*  
39 *polyclonal* anti-Ubc9 (Abcam, ab33044); anti-human CENP-A (Abcam, 33565), anti mouse CENP-A  
40 (Upstate, 07-574), anti-GFP (LifeTech), anti-HA (Sigma, H6908), anti-SUMO-1 (Cell Signaling, 4971),  
41 anti-SUMO2/3 (Abcam, ab3742), anti-RNF4 (Sigma, 1125), anti-actin (Sigma, A2066), anti-PIAS4  
42 (Abcam, ab58416).  
43

## 1 **Statistical analyses**

2 Student's *t*-tests were performed using Microsoft Excel version 12.2.4 for MAC OS X. The results were  
3 calculated with the paired test. Results were considered as significant (\*) for a *p* value  $\leq 0,05$ .

## 5 **Supplemental material**

6 Supplemental material contains four figures.

## 9 **Acknowledgments**

10 We thank H. Masumoto (Kazusa DNA Research Institute, Chiba, Japan) for providing the MEF CENP-  
11 B  $-/-$  and  $+/+$  cells and the mAb anti-CENP-B (clone 5E6C1) and the Centre Technologique des  
12 Microstructures (CT $\mu$ ) of the Université Claude Bernard Lyon 1 for the confocal microscopy. PL is a  
13 CNRS Research Director.

## 15 **Authors contribution**

16 Conceptualization : JEM, PL

17 Funding acquisition: PL

18 Investigation : JEM, PT, IE, CC, AC, FC, CB

19 Methodology : JEM, FC, CB, PL

20 Supervision : PL

21 Validation : JEM, FC, CB, PL

22 Writing – original draft: PL

23 Writing – review & editing : JEM, AC, FC, CB, PL

## 25 **Competing interests**

26 No competing interests declared

## 28 **Funding**

29 This work was funded by grants from CNRS (<http://www.cnrs.fr>), INSERM (<https://www.inserm.fr>),  
30 University Claude Bernard Lyon 1 (<https://www.univ-lyon1.fr>), French National Agency for  
31 Research-ANR (PL, ML, VIRUCEPTION, ANR-13-BSV3-0001-01, [http://www.agence-nationale-](http://www.agence-nationale-recherche.fr)  
32 [recherche.fr](http://www.agence-nationale-recherche.fr)), LabEX DEVweCAN (PL, CC, ANR-10-LABX-61, [http://www.agence-](http://www.agence-nationale-recherche.fr)  
33 [nationalerecherche.fr](http://www.agence-nationale-recherche.fr)), La Ligue régionale contre le Cancer and the FINOVI foundation (grant  
34 #142690).

## 37 **References**

- 38 **Azuma, Y., Arnaoutov, A., Anan, T. and Dasso, M.** (2005). PIASy mediates SUMO-2 conjugation of Topoisomerase-II  
39 on mitotic chromosomes. *The EMBO journal* **24**, 2172–2182.
- 40 **Beauchair, G., Bridier-Nahmias, A., Zagury, J.-F., Saïb, A. and Zamborlini, A.** (2015). JASSA: a comprehensive tool for  
41 prediction of SUMOylation sites and SIMs. *Bioinformatics*.
- 42 **Bergmann, J. H., Martins, N. M. C., Larionov, V., Masumoto, H. and Earnshaw, W. C.** (2012). HACking the centromere  
43 chromatin code: insights from human artificial chromosomes. *Chromosome Res.* **20**, 505–519.
- 44 **Bruderer, R., Tatham, M. H., Plechanovova, A., Matic, I., Garg, A. K. and Hay, R. T.** (2011). Purification and  
45 identification of endogenous polySUMO conjugates. *EMBO reports* **12**, 142–148.
- 46 **Dasso, M.** (2008). Emerging roles of the SUMO pathway in mitosis. *Cell Div* **3**, 5.
- 47 **Earnshaw, W. C. and Rothfield, N.** (1985). Identification of a family of human centromere proteins using autoimmune  
48 sera from patients with scleroderma. *Chromosoma* **91**, 313–321.
- 49 **Earnshaw, W. C., Machlin, P. S., Bordwell, B. J., Rothfield, N. F. and Cleveland, D. W.** (1987a). Analysis of  
50 anticentromere autoantibodies using cloned autoantigen CENP-B. *Proc. Natl. Acad. Sci. U.S.A.* **84**, 4979–4983.
- 51 **Earnshaw, W. C., Sullivan, K. F., Machlin, P. S., Cooke, C. A., Kaiser, D. A., Pollard, T. D., Rothfield, N. F. and**

- 1 **Cleveland, D. W.** (1987b). Molecular cloning of cDNA for CENP-B, the major human centromere autoantigen. *J. Cell*  
2 *Biol.* **104**, 817–829.
- 3 **Erliandri, I., Fu, H., Nakano, M., Kim, J.-H., Miga, K. H., Liskovych, M., Earnshaw, W. C., Masumoto, H., Kouprina,**  
4 **N., Aladjem, M. I., et al.** (2014). Replication of alpha-satellite DNA arrays in endogenous human centromeric  
5 regions and in human artificial chromosome. *Nucleic acids research* **42**, 11502–11516.
- 6 **Everett, R. D., Earnshaw, W. C., Findlay, J. and Lomonte, P.** (1999). Specific destruction of kinetochore protein CENP-  
7 C and disruption of cell division by herpes simplex virus immediate-early protein Vmw110. *The EMBO journal* **18**,  
8 1526–38.
- 9 **Fachinetti, D., Diego Folco, H., Nechemia-Arbely, Y., Valente, L. P., Nguyen, K., Wong, A. J., Zhu, Q., Holland, A. J.,**  
10 **Desai, A., Jansen, L. E. T., et al.** (2013). A two-step mechanism for epigenetic specification of centromere identity  
11 and function. *Nature cell biology* **15**, ncb2805–1066.
- 12 **Fachinetti, D., Han, J. S., McMahon, M. A., Ly, P., Abdullah, A., Wong, A. J. and Cleveland, D. W.** (2015). DNA  
13 Sequence-Specific Binding of CENP-B Enhances the Fidelity of Human Centromere Function. *Dev. Cell* **33**, 327.
- 14 **Fowler, K. J., Hudson, D. F., Salamonsen, L. A., Edmondson, S. R., Earle, E., Sibson, M. C. and Choo, K. H.** (2000).  
15 Uterine dysfunction and genetic modifiers in centromere protein B-deficient mice. *Genome Res.* **10**, 30–41.
- 16 **Fowler, K. J., Wong, L. H., Griffiths, B. K., Sibson, M. C., Reed, S. and Choo, K. H. A.** (2004). Centromere protein b-null  
17 mice display decreasing reproductive performance through successive generations of breeding due to diminishing  
18 endometrial glands. *Reproduction* **127**, 377.
- 19 **Galanty, Y., Belotserkovskaya, R., Coates, J. and Jackson, S. P.** (2012). RNF4, a SUMO-targeted ubiquitin E3 ligase,  
20 promotes DNA double-strand break repair. *Genes & development* **26**, 1179–1195.
- 21 **Gross, S., Catez, F., Masumoto, H. and LOMONTE, P.** (2012). Centromere Architecture Breakdown Induced by the  
22 Viral E3 Ubiquitin Ligase ICP0 Protein of Herpes Simplex Virus Type 1. *PLoS one* **7**, e44227.
- 23 **Guenatri, M., Bailly, D., Maison, C. and Almouzni, G.** (2004). Mouse centric and pericentric satellite repeats form  
24 distinct functional heterochromatin. *J. Cell Biol.* **166**, 493–505.
- 25 **Hemmerich, P., Weidtkamp-Peters, S., Hoischen, C., Schmiedeberg, L., Erliandri, I. and Diekmann, S.** (2008).  
26 Dynamics of inner kinetochore assembly and maintenance in living cells. *J. Cell Biol.* **180**, 1101–1114.
- 27 **Hendriks, I. A., Treffers, L. W., Verlaan-de Vries, M., Olsen, J. V. and Vertegaal, A. C. O.** (2015). SUMO-2 Orchestrates  
28 Chromatin Modifiers in Response to DNA Damage. *Cell Rep.*
- 29 **Hoffmann, S., Dumont, M., Barra, V., Ly, P., Nechemia-Arbely, Y., McMahon, M. A., Hervé, S., Cleveland, D. W. and**  
30 **Fachinetti, D.** (2016). CENP-A Is Dispensable for Mitotic Centromere Function after Initial  
31 Centromere/Kinetochore Assembly. *Cell Rep* **17**, 2404.
- 32 **Hudson, D. F., Fowler, K. J., Earle, E., Saffery, R., Kalitsis, P., Trowell, H., Hill, J., Wreford, N. G., de Kretser, D. M.,**  
33 **Cancilla, M. R., et al.** (1998). Centromere protein B null mice are mitotically and meiotically normal but have  
34 lower body and testis weights. *J. Cell Biol.* **141**, 309–319.
- 35 **Johnson, E. S. and Gupta, A. A.** (2001). An E3-like factor that promotes SUMO conjugation to the yeast septins. *Cell*  
36 **106**, 735–744.
- 37 **Kapoor, M., Montes de Oca Luna, R., Liu, G., Lozano, G., Cummings, C., Mancini, M., Ouspenski, I., Brinkley, B. R.**  
38 **and May, G. S.** (1998). The cenpB gene is not essential in mice. *Chromosoma* **107**, 570–576.
- 39 **Kitagawa, K., Masumoto, H., Ikeda, M. and Okazaki, T.** (1995). Analysis of protein-DNA and protein-protein  
40 interactions of centromere protein B (CENP-B) and properties of the DNA-CENP-B complex in the cell cycle.  
41 *Molecular and cellular biology* **15**, 1602–1612.
- 42 **Lam, A. L., Boivin, C. D., Bonney, C. F., Rudd, M. K. and Sullivan, B. A.** (2006). Human centromeric chromatin is a  
43 dynamic chromosomal domain that can spread over noncentromeric DNA. *Proc. Natl. Acad. Sci. U.S.A.* **103**, 4186–  
44 4191.
- 45 **Lomonte, P. and Morency, E.** (2007). Centromeric protein CENP-B proteasomal degradation induced by the viral  
46 protein ICP0. *FEBS Lett.* **581**, 658–662.
- 47 **Lomonte, P., Sullivan, K. F. and Everett, R. D.** (2000). Degradation of Nucleosome-associated Centromeric Histone  
48 H3-like Protein CENP-A Induced by Herpes Simplex Virus Type 1 Protein ICP0. *Journal of Biological Chemistry* **276**,  
49 5829–5835.
- 50 **Lomonte, P., Thomas, J., Texier, P., Caron, C., Khochbin, S. and Epstein, A. L.** (2004). Functional interaction between  
51 class II histone deacetylases and ICP0 of herpes simplex virus type 1. *J. Virol.* **78**, 6744–6757.
- 52 **Maison, C., Romeo, K., Bailly, D., Dubarry, M., Quivy, J.-P. and Almouzni, G.** (2012). The SUMO protease SENP7 is a  
53 critical component to ensure HP1 enrichment at pericentric heterochromatin. *Nat. Struct. Mol. Biol.* **19**, 458–460.
- 54 **Martens, J. H. A., O'Sullivan, R. J., Braunschweig, U., Opravil, S., Radolf, M., Steinlein, P. and Jenuwein, T.** (2005).  
55 The profile of repeat-associated histone lysine methylation states in the mouse epigenome. *The EMBO journal* **24**,  
56 812.
- 57 **Masumoto, H., Ikeno, M., Nakano, M., Okazaki, T., Grimes, B., Cooke, H. and Suzuki, N.** (1998). Assay of centromere  
58 function using a human artificial chromosome. *Chromosoma* **107**, 406–416.
- 59 **Masumoto, H., Masukata, H., Muro, Y., Nozaki, N. and Okazaki, T.** (1989). A human centromere antigen (CENP-B)  
60 interacts with a short specific sequence in alphoid DNA, a human centromeric satellite. *J. Cell Biol.* **109**, 1963–1973.
- 61 **Morozov, V. M., Giovinazzi, S. and Ishov, A. M.** (2017). CENP-B protects centromere chromatin integrity by facilitating  
62 histone deposition via the H3.3-specific chaperone Daxx. *Epigenetics Chromatin* **10**, 63.
- 63 **Mravinac, B., Sullivan, L. L., Reeves, J. W., Yan, C. M., Kopf, K. S., Farr, C. J., Schueler, M. G. and Sullivan, B. A.**  
64 (2009). Histone modifications within the human X centromere region. *PLoS one* **4**, e6602.

- 1 **Mukhopadhyay, D., Arnaoutov, A. and Dasso, M.** (2010). The SUMO protease SENP6 is essential for inner kinetochore  
2 assembly. *J. Cell Biol.* **188**, 681–692.
- 3 **Muro, Y., Masumoto, H., Yoda, K., Nozaki, N., Ohashi, M. and Okazaki, T.** (1992). Centromere protein B assembles  
4 human centromeric alpha-satellite DNA at the 17-bp sequence, CENP-B box. *J. Cell Biol.* **116**, 585–596.
- 5 **Nakano, M., Cardinale, S., Noskov, V. N., Gassmann, R., Vagnarelli, P., Kandels-Lewis, S., Larionov, V., Earnshaw,  
6 W. C. and Masumoto, H.** (2008). Inactivation of a human kinetochore by specific targeting of chromatin modifiers.  
7 *Dev. Cell* **14**, 507–522.
- 8 **Nakashima, H., Nakano, M., Ohnishi, R., Hiraoka, Y., Kaneda, Y., Sugino, A. and Masumoto, H.** (2005). Assembly of  
9 additional heterochromatin distinct from centromere-kinetochore chromatin is required for de novo formation of  
10 human artificial chromosome. *Journal of cell science* **118**, 5885–5898.
- 11 **Ohzeki, J., Nakano, M., Okada, T. and Masumoto, H.** (2002). CENP-B box is required for de novo centromere  
12 chromatin assembly on human alphoid DNA. *J. Cell Biol.* **159**, 765–775.
- 13 **Ohzeki, J.-I., Bergmann, J. H., Kouprina, N., Noskov, V. N., Nakano, M., Kimura, H., Earnshaw, W. C., Larionov, V.  
14 and Masumoto, H.** (2012). Breaking the HAC Barrier: histone H3K9 acetyl/methyl balance regulates CENP-A  
15 assembly. *The EMBO journal* **31**, 2391–2402.
- 16 **Okada, T., Ohzeki, J., Nakano, M., Yoda, K., Brinkley, W. R., Larionov, V. and Masumoto, H.** (2007). CENP-B Controls  
17 Centromere Formation Depending on the Chromatin Context. *Cell* **131**, 1287–1300.
- 18 **Okamoto, Y., Nakano, M., Ohzeki, J., Larionov, V. and Masumoto, H.** (2007). A minimal CENP-A core is required for  
19 nucleation and maintenance of a functional human centromere. *The EMBO journal* **26**, 1279–1291.
- 20 **Perez-Castro, A. V., Shamanski, F. L., Meneses, J. J., Lovato, T. L., Vogel, K. G., Moyzis, R. K. and Pedersen, R.**  
21 (1998). Centromeric protein B null mice are viable with no apparent abnormalities. *Dev. Biol.* **201**, 135–143.
- 22 **Pluta, A. F., Saitoh, N., Goldberg, I. and Earnshaw, W. C.** (1992). Identification of a subdomain of CENP-B that is  
23 necessary and sufficient for localization to the human centromere. *J. Cell Biol.* **116**, 1081–1093.
- 24 **Pourcet, B., Pineda-Torra, I., Derudas, B., Staels, B. and Glineur, C.** (2010). SUMOylation of human peroxisome  
25 proliferator-activated receptor alpha inhibits its trans-activity through the recruitment of the nuclear corepressor  
26 NCoR. *The Journal of biological chemistry* **285**, 5983–5992.
- 27 **Rojas-Fernandez, A., Plechanovova, A., Hattersley, N., Jaffray, E., Tatham, M. H. and Hay, R. T.** (2014). SUMO chain-  
28 induced dimerization activates RNF4. *Molecular cell* **53**, 892.
- 29 **Roth, W., Sustmann, C., Kieslinger, M., Gilmozzi, A., Irmer, D., Kremmer, E., Turck, C. and Grosschedl, R.** (2004).  
30 PIASy-deficient mice display modest defects in IFN and Wnt signaling. *J. Immunol.* **173**, 6189–6199.
- 31 **Rytinki, M. M., Kaikkonen, S., Pehkonen, P., Jääskeläinen, T. and Palvimo, J. J.** (2009). PIAS proteins: pleiotropic  
32 interactors associated with SUMO. *Cell. Mol. Life Sci.* **66**, 3029–3041.
- 33 **Schueler, M. G. and Sullivan, B. A.** (2006). Structural and functional dynamics of human centromeric chromatin. *Annu*  
34 *Rev Genomics Hum Genet* **7**, 301–313.
- 35 **Sloan, E., Tatham, M. H., Gros Lambert, M., Glass, M., Orr, A., Hay, R. T. and Everett, R. D.** (2015). Analysis of the  
36 SUMO2 Proteome during HSV-1 Infection. *PLoS Pathog.* **11**, e1005059.
- 37 **Solovei, I., Cavallo, A., Schermelleh, L., Jaunin, F., Scasselati, C., Cmarko, D., Cremer, C., Fakan, S. and Cremer, T.**  
38 (2002). Spatial preservation of nuclear chromatin architecture during three-dimensional fluorescence in situ  
39 hybridization (3D-FISH). *Experimental cell research* **276**, 10–23.
- 40 **Stimpson, K. M. and Sullivan, B. A.** (2011). Histone H3K4 methylation keeps centromeres open for business. *The*  
41 *EMBO journal* **30**, 233–234.
- 42 **Sullivan, B. A. and Karpen, G. H.** (2004). Centromeric chromatin exhibits a histone modification pattern that is distinct  
43 from both euchromatin and heterochromatin. *Nat. Struct. Mol. Biol.* **11**, 1083.
- 44 **Tachiwana, H., Miya, Y., Shono, N., Ohzeki, J.-I., Osakabe, A., Otake, K., Larionov, V., Earnshaw, W. C., Kimura, H.,  
45 Masumoto, H., et al.** (2013). Nap1 regulates proper CENP-B binding to nucleosomes. *Nucleic acids research* **41**,  
46 2869–2880.
- 47 **Tanaka, Y., Kurumizaka, H. and Yokoyama, S.** (2005a). CpG methylation of the CENP-B box reduces human CENP-B  
48 binding. *FEBS J.* **272**, 282–289.
- 49 **Tanaka, Y., Tachiwana, H., Yoda, K., Masumoto, H., Okazaki, T., Kurumizaka, H. and Yokoyama, S.** (2005b). Human  
50 centromere protein B induces translational positioning of nucleosomes on alpha-satellite sequences. *The Journal of*  
51 *biological chemistry* **280**, 41609–41618.
- 52 **Tatham, M. H., Geoffroy, M.-C., Shen, L., Plechanovova, A., Hattersley, N., Jaffray, E. G., Palvimo, J. J. and Hay, R. T.**  
53 (2008). RNF4 is a poly-SUMO-specific E3 ubiquitin ligase required for arsenic-induced PML degradation. *Nature*  
54 *cell biology* **10**, 538–546.
- 55 **Tawaramoto, M. S., Park, S. Y., Tanaka, Y., Nureki, O., Kurumizaka, H. and Yokoyama, S.** (2003). Crystal structure  
56 of the human centromere protein B (CENP-B) dimerization domain at 1.65-Å resolution. *The Journal of biological*  
57 *chemistry* **278**, 51454–51461.
- 58 **Khemalce, B., Seeler, J.-S., Thon, G., Dejean, A. and Arcangioli, B.** (2004). Role of the fission yeast SUMO E3 ligase  
59 Pli1p in centromere and telomere maintenance. *The EMBO journal* **23**, 3844–3853.
- 60 **Yoda, K., Kitagawa, K., Masumoto, H., Muro, Y. and Okazaki, T.** (1992). A human centromere protein, CENP-B, has a  
61 DNA binding domain containing four potential alpha helices at the NH2 terminus, which is separable from  
62 dimerizing activity. *J. Cell Biol.* **119**, 1413–1427.
- 63  
64



1 Figure legends

2

3 Figure 1. Centromeric protein B (CENP-B) is SUMOylated in vitro and in vivo

- 4 (A) Left: Consensus sequences for SUMOylation sites in the CENP-B sequence. Right: Joined  
5 Advanced Sumoylation Site and SIM Analyser (JASSA; <http://www.jassa.sitesgb.info/>)  
6 (Beauclair et al., 2015) scores for potential SUMOylated K and mutations performed for each  
7 K (for details see the Materials and Methods section). \* indicates a consensus inverted site.  
8 (B) Left: Schematic representations of the different tagged CENP-B proteins used in this study.  
9 Right: Summary of the immunofluorescence data shown in Figs. 2 and Table 1 for the  
10 colocalization of ectopically expressed CENP-B proteins with centromeres in HeLa and MEF  
11 CENP-B<sup>-/-</sup> cells. ++: all CENP-B spots co-localize with centromeres; +/-: a subset of CENP-B  
12 spots co-localizes with centromeres; -: no colocalization of CENP-B with centromeres.  
13 (C) In vitro SUMOylation assay of 6xHis-FLAG-CENP-B, 6xHis-FLAG-CENP-B\_3K, and 6xHis-  
14 FLAG-CENP-B\_4K. 6xHis-FLAG-PML isoform IV was used as a positive control. WB was  
15 performed using an anti-FLAG antibody to detect tagged proteins. The LI-COR Infrared  
16 Fluorescent Imaging System was used to detect and quantify the signals (see original blot in  
17 Fig. S1A). Boxes: unmodified CENP-B or PML.  
18 (D) In vitro SUMOylation assay of 6xHis-FLAG-CENP-B, 6xHis-FLAG-CENP-B $\Delta$ DBD, and 6xHis-  
19 FLAG-CENP-B $\Delta$ DBD\_K402G. Up: Western Blot (WB) was performed using an anti-FLAG  
20 antibody to detect tagged proteins. LI-COR was used to detect and quantify signals (see  
21 original blot in Fig. S1B). Boxes: unmodified CENP-B.  
22 (E) His pull-down assays using extracts from cells co-transfected with expression vectors for HA-  
23 CENP-B and 6xhis-SUMO-1. WB was performed using an anti-HA antibody to detect CENP-B  
24 proteins pulled-down with His-SUMO-1. \* indicates an extra CENP-B band associated with the  
25 co-expression of CENP-B with His-SUMO-1.

26

27 Figure 2. CENP-B targeting at centromeres is dependent on SUMOylation but not CENP-B K402

- 28 (A) WB of HeLa cell extracts not transfected (Ctl) or transfected with control siRNA (siCtl) or Ubc9  
29 siRNA (siUbc9) for 48 h prior to transfection with HA-CENP-B expressing plasmid. Decreases  
30 in Ubc9 induced by siUbc9 do not affect the overall expression of HA-CENP-B. Actin was used  
31 as a loading control.  
32 (B) Left: Immunofluorescence to detect HA-CENP-B patterns in HeLa cells not transfected (Ctl) or  
33 transfected with control siRNA (siCtl) or Ubc9 siRNA (siUbc9). Three major patterns were  
34 observed for the HA-CENP-B signal: (i) centromeres localization; (ii) over-expressed with  
35 aggregates; (iii) diffuse. Each pattern shows different frequencies of co-localization between  
36 HA-CENP-B and CENP-A (full, intermediate, or no-colocalization). Right: Quantification of the  
37 patterns in cells positives for HA-CENP-B signal and in the different samples. \* indicates  
38 significant difference (p value  $\leq$  0.05) in the scores based on Student's *t*-test. Bars = 5  $\mu$ m.  
39 (C) Immunofluorescence performed on HeLa or MEF CENP-B<sup>-/-</sup> cells ectopically expressing wild  
40 type CENP-B or several CENP-B mutants. +: indicates that co-localization with CENP-A could  
41 be observed; -: indicates that no co-localization with CENP-A could be observed. Bars = 5  $\mu$ m.

42

43 Figure 3. CENP-B accumulation at centromeres and CENP-B turnover are affected by proteasome  
44 inactivation and mutation of K402.

- 45 (A) Synopsis of the potential regulation of CENP-B amount at centromeres.

- 1 (B) Left: Immunofluorescence to detect ectopically expressed HA-CENP-Bwt, HA-CENP-B $\Delta$ DBD,  
2 and HA-CENP-B $\Delta$ DBD\_K402G in HeLa cells in the absence or presence of the proteasome  
3 inhibitor MG132. Bars = 5 $\mu$ m. +: indicates co-localization between CENP-B and CENP-A was  
4 observed; -: indicates that no co-localization between CENP-B and CENP-A was observed.  
5 Middle: Size of the CENP-B spots according to the region of interest (ROI) as determined using  
6 ImageJ software. HA-CENP-B $\Delta$ DBD does not show focused signals (spots) above the general  
7 nucleoplasmic background. Right: Quantification of the size of the spots (pixel/spots) in  
8 different experimental conditions. Data are means of three independently performed  
9 experiments. NA= Not applicable.
- 10 (C) Immuno-FISH for the detection of ectopically expressed HA-CENP-Bwt, HA-CENP-B $\Delta$ DBD,  
11 and HA-CENP-B $\Delta$ DBD\_K402G in HeLa cells in the absence or presence of the proteasome  
12 inhibitor MG132. Centromeres were detected using a human chromosome pan-centromeric  
13 biotin probe. Bars = 5  $\mu$ m.
- 14 (D) Fluorescence Recovery After Photobleaching (FRAP) analysis of GFP-CENP-Bwt and GFP-  
15 CENP-B\_K402G mobility at centromeres. Top: representative images showing the  
16 centromere-associated fluorescence before, during (0 s) and after (50 and 120 s)  
17 photobleaching. Boxed areas 1 and 2 represent two centromeres simultaneously bleached;  
18 area 3 represents an unbleached centromere. Bottom: measure of the fluorescence recovery  
19 for GFP-CENP-Bwt and GFP-CENP-B\_K402G.

21 Figure 4. Proteasome inhibition induces SUMO and ubiquitin accumulation at centromeres in a  
22 manner dependent on CENP-B targeting at the centromere.

- 23 (A) Synopsis of the potential regulation of CENP-B amount at centromeres through ubiquitination  
24 or SUMOylation/ubiquitination and proteasomal degradation pathways.
- 25 (B) Immunofluorescence to detect endogenous SUMO-1 and SUMO-2/3 at centromeres (detected  
26 by endogenous CENP-B and/or CENP-A), in HeLa cells not treated or treated with the  
27 proteasome inhibitor MG132 for 5 h. Bars = 5  $\mu$ m. N/A: not applicable; +: indicates that co-  
28 localizations could be observed; -: indicates that no co-localization could be observed.
- 29 (C) Immunofluorescence to detect SUMO-1 at centromeres in HeLa cells expressing HA-CENP-  
30 Bwt, HA-CENP-B $\Delta$ DBD, or HA-CENP-B $\Delta$ DBD\_K402G in the absence or presence of the  
31 proteasome inhibitor MG132. Bars = 5  $\mu$ m. +: indicates that co-localization was observed; -:  
32 indicates that no co-localization was observed.
- 33 (D) Immunofluorescence to detect ubiquitin at centromeres in HeLa cells expressing HA-CENP-  
34 Bwt, HA-CENP-B $\Delta$ DBD, or HA-CENP-B $\Delta$ DBD\_K402G in the absence or presence of the  
35 proteasome inhibitor MG132. Bars = 5  $\mu$ m. +: indicates that co-localization was observed; -:  
36 indicates that no co-localization was observed.
- 37 (E) Immunofluorescence to co-detect CENP-B and SUMO-1 at centromeres in MEF CENP-B<sup>-/-</sup> cells  
38 expressing HA-CENP-Bwt, HA-CENP-B $\Delta$ DBD, or HA-CENP-B $\Delta$ DBD\_K402G in the absence or  
39 presence of the proteasome inhibitor MG132. Bars = 5  $\mu$ m.

41 Figure 5. CENP-B stability depends on RNF4 E3 ubiquitin ligase activity

- 42 (A) Immunofluorescence to detect endogenous CENP-B (i to iv and vi) or CENP-A (v and vii) in  
43 HeLa cells ectopically expressing HA-RNF4wt (i, ii, and v) or its dominant-negative (DN)  
44 mutant HA-RNF4<sub>DN</sub> (iii, iv, vi and vii). Two magnifications are shown for CENP-B to better  
45 illustrate the effects. Arrows indicate cells expressing HA-RNF4wt or DN and showing a

1 decrease in CENP-B signal or not, respectively. vi and vii illustrate the co-localization of  
2 RNF4<sub>DN</sub> with CENP-B and CENP-A, respectively. Bars = 5  $\mu$ m.

3 (B) Quantification of cells showing a decrease of CENP-B at centromeres in HeLa cells ectopically  
4 expressing HA-RNF4wt or HA-RNF4<sub>DN</sub> alone or in combination with SUMO-1 or SUMO-2. The  
5 results show means of three independent experiments ( $\pm$  standard deviation; SD). \*  $p \leq 0.05$ ,  
6 \*\*\*  $p \leq 0.001$  (Student's *t*-test).

7 (C) Co-immunoprecipitation of CENP-B with RNF4 or RNF4<sub>DN</sub> in the presence of the SUMO  
8 protease inhibitor N-ethylmaleimide (NEM).

9 (D) Co-immunoprecipitation of CENP-B with RNF4 or RNF4<sub>DN</sub> in the absence (-) or presence (+)  
10 of NEM. CENP-B, RNF4, SUMO-1, SUMO-2, and ubiquitin were detected.

11 (E) Co-immunoprecipitation of RNF4 or RNF4<sub>DN</sub> with CENP-B in the absence (-) or presence (+)  
12 of NEM. CENP-B, RNF4, SUMO-1, and SUMO-2 were detected. Arrows indicate remaining  
13 CENP-B signal after stripping of the membranes.

14 (F) Up: WB of CENP-B ectopically co-expressed with RNF4wt or RNF4<sub>DN</sub>. Middle: Quantification  
15 of CENP-B (graph and values) and actin (values) amounts in each lane (relative amounts).  
16 Down: Quantification of CENP-B mRNA

17  
18 Figure 6. RNF4 is involved in the control of CENP-B stability at centromeres.

19 (A) Synopsis of the experiment.

20 (B) Immunofluorescence to detect endogenous CENP-B in HeLa cells treated with a control siRNA  
21 (siCtl) or siRNAs targeting CENP-B, RNF4, or both.

22 (C) Up: WB of endogenous CENP-B, RNF4, or CENP-A of HeLa cell extracts not transfected  
23 (Control) or transfected with control siRNA (siCtl), siRNAs targeting CENP-B, RNF4, or both.  
24 Actin was used as a loading control. Down: Quantification of CENP-B (graph and values) and  
25 actin (values) amounts in each lane (relative amounts).

26 (D) Real Time-quantitative PCR to detect CENP-B or RNF4 mRNA in HeLa cells transfected with  
27 control siRNA (siCtl) or siRNAs targeting CENP-B, RNF4, or both. Data were normalized on the  
28 actin housekeeping gene. The results show means of three independent experiments ( $\pm$   
29 standard deviation; SD). \*\*  $p \leq 0.01$  (Student's *t*-test).

30  
31 Figure 7. PIASs are involved in the control of CENP-B stability at centromeres.

32 (A) Synopsis of the experiment.

33 (B) Immunofluorescence of endogenous CENP-B in HeLa cells transfected with control siRNA  
34 (siCtl), siRNA targeting CENP-B, pooled siRNAs targeting PIAS1, 2, or 4, or CENP-B and PIAS1,  
35 2, or 4.

36 (C) Up: WB of endogenous CENP-B, PIAS1, PIAS4, or CENP-A of HeLa cell extracts not transfected  
37 (Control) or transfected with control siRNA (siCtl), siRNA targeting CENP-B, pooled siRNAs  
38 targeting PIAS1, 2, or 4, or CENP-B and PIAS1, 2, or 4. Actin was used as a loading control.  
39 Down: Quantification of CENP-B (graph and values) and actin (values) amounts in each lane  
40 (relative amounts).

41 (D) Model of CENP-B SUMOylation and ubiquitination-dependent turnover at centromeres.  
42 Explanations are provided in the Discussion. In grey are hypothetical contributors/activities  
43 whose implications have not been demonstrated in the present study.

44  
45 Figure S1. In vitro SUMOylation assays of: (A) 6xHis-FLAG-CENP-B, 6xHis-FLAG-CENP-B\_3K, 6xHis-  
46 FLAG-CENP-B\_4K, and 6xHis-FLAG-PML isoform IV (used as positive control); (B) 6xHis-FLAG-CENP-

1 B, 6xHis-FLAG-CENP-B $\Delta$ DBD\_K402G, and 6xHis-FLAG-CENP-B $\Delta$ DBD Tops: WB was performed using  
 2 an anti FLAG antibody for the detection of tagged proteins. LI-COR Infrared Fluorescent Imaging  
 3 System was used for the detection and quantification of the signals. Bottoms: (A) quantification of  
 4 the CENP-B wt and mutants, and PML unmodified bands (boxed in the WB image). Unmodified CENP-  
 5 Bwt signal decreased oppositely to the increase of CENP-Bwt-associated SUMO forms (compare  
 6 signal relative intensity in boxed area of lanes 3 and 4). CENP-B\_3K also showed a decrease in its  
 7 relative intensity following SUMOylation compared to that of the unmodified protein (compare lanes  
 8 5 and 6), suggesting that although these K residues within the DBD do not contribute to the majority  
 9 of CENP-B SUMOylation they were likely modified; (B) quantification of the CENP-Bwt and truncated  
 10 CENP-B unmodified bands (boxed in the WB image). Unmodified CENP-B signals decreased  
 11 oppositely to the increase of CENP-B-associated SUMO forms.

12  
 13 Figure S2. (A) Immunofluorescence to detect GFP-CENP-B (i), GFP-CENP-B\_K402G (ii), GFP-CENP-  
 14 B $\Delta$ DBD (iii), and GFP-CENP-B $\Delta$ DBD\_K402G (iv) at centromeres in HeLa cells. Centromeres were  
 15 visualized by the detection of CENP-A. Bars = 5  $\mu$ m. (B) Fluorescence Recovery After Photobleaching  
 16 (FRAP) analysis of GFP, GFP-CENP-B $\Delta$ DBD and GFP-CENP-B $\Delta$ DBD\_K402G mobility in the  
 17 nucleoplasm. Bleaching was performed in the nucleoplasm using a single bleach spot. GFP was used  
 18 as a reference of freely diffusing protein.

19  
 20 Figure S3. Immunofluorescence to detect SUMO-2/3 at centromeres in HeLa cells expressing HA-  
 21 CENP-Bwt, HA-CENP-B $\Delta$ DBD, HA-CENP-B $\Delta$ DBD\_K402G in absence or presence of the proteasome  
 22 inhibitor MG132. Bars = 5  $\mu$ m. +: indicates that co-localization between CENP-B proteins and SUMO-  
 23 2/3 could be observed; -: indicates that no co-localization between CENP-B proteins and SUMO-2/3  
 24 could be observed.

25  
 26 Figure S4. Immunofluorescence to detect CENP-B and CENP-A (A) or SUMO-2/3 (B) or ubiquitin (C)  
 27 in MEF CENP-B  $^{-/-}$  cells expressing HA-CENP-Bwt, HA-CENP-B $\Delta$ DBD, HA-CENP-B $\Delta$ DBD\_K402G in  
 28 absence or presence of proteasome inhibitor MG132. Bars = 5  $\mu$ m.

29  
 30  
 31  
 32  
 33  
 34 Table 1: Centromeric localization of ectopically expressed CENP-B in MEF CENP-B  $^{-/-}$  cells

| HA-CENP-B          | Description                                                                                               | HA-CENP-B positive cells showing CENP-B co-localization with CENP-A (%) |
|--------------------|-----------------------------------------------------------------------------------------------------------|-------------------------------------------------------------------------|
| _Wt                | Wild type CENP-B                                                                                          | 87,9 $\pm$ 10.5                                                         |
| $\Delta$ DBD       | CENP-B deleted of its 129 first aa containing the DNA binding domain                                      | 0                                                                       |
| _K402G             | CENP-B mutated on K402                                                                                    | 90.3 $\pm$ 8.1 <sup>(1)</sup>                                           |
| $\Delta$ DBD_K402G | CENP-B deleted of its 129 first aa containing the DNA binding domain and additionally mutated on the K402 | 4.1 $\pm$ 2.6                                                           |

35 <sup>(1)</sup> Although with a similar pattern than CENP-Bwt, the CENP-B\_K402G shows more intense  
 36 centromeric spots  
 37  
 38

**A.**

SUMO Site\_1  
 21 EENPDLRK<sub>28</sub>GEIARRFNIPPS 40

SUMO Site\_2  
 51 AILASERK<sub>59</sub>YGVASTCRKTNK 70

SUMO Site\_3  
 71 LSPYDK<sub>76</sub>LEGLLIAWFQQIRA 90

SUMO Site\_4  
 391 GGNATITTSLK<sub>402</sub>SEGESEEEEE 410

| SUMO Site | wtSeq | JASSAScore | Mutation |
|-----------|-------|------------|----------|
| 1         | RKGE  | 1.57       | RPGE     |
| 2         | ERKY* | 0.393      | ERGY     |
| 3         | DKLE  | 1.019      | DGLE     |
| 4         | LKSE  | <b>8.7</b> | LGSE     |

\* Consensus inverted

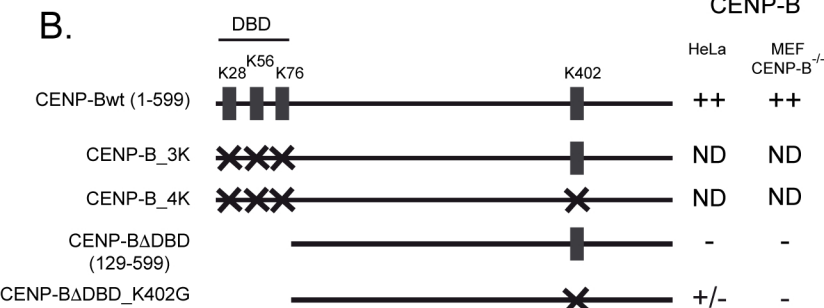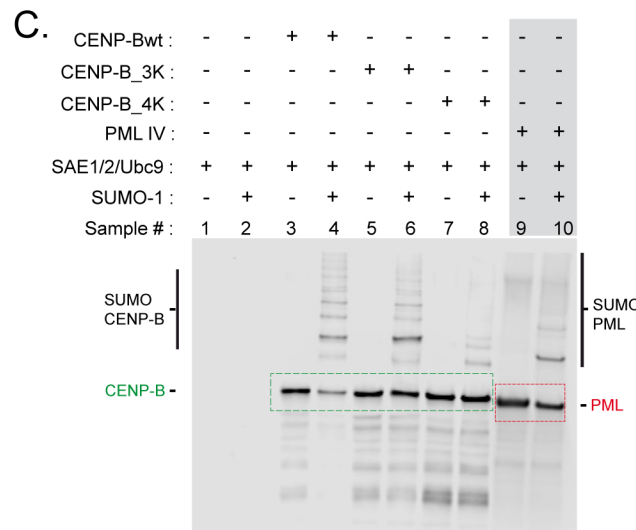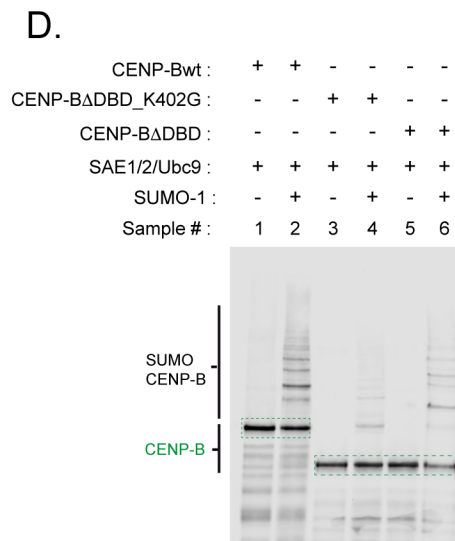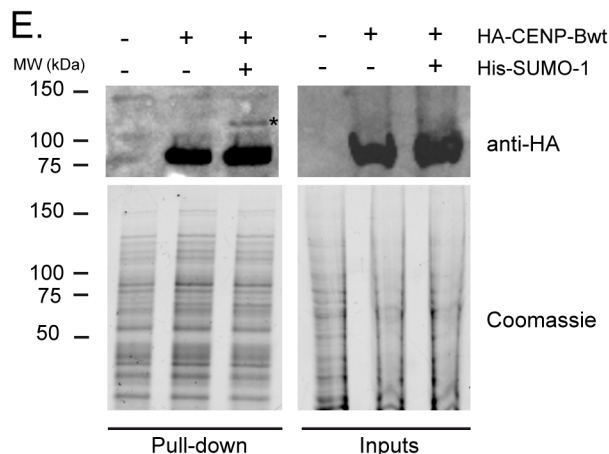

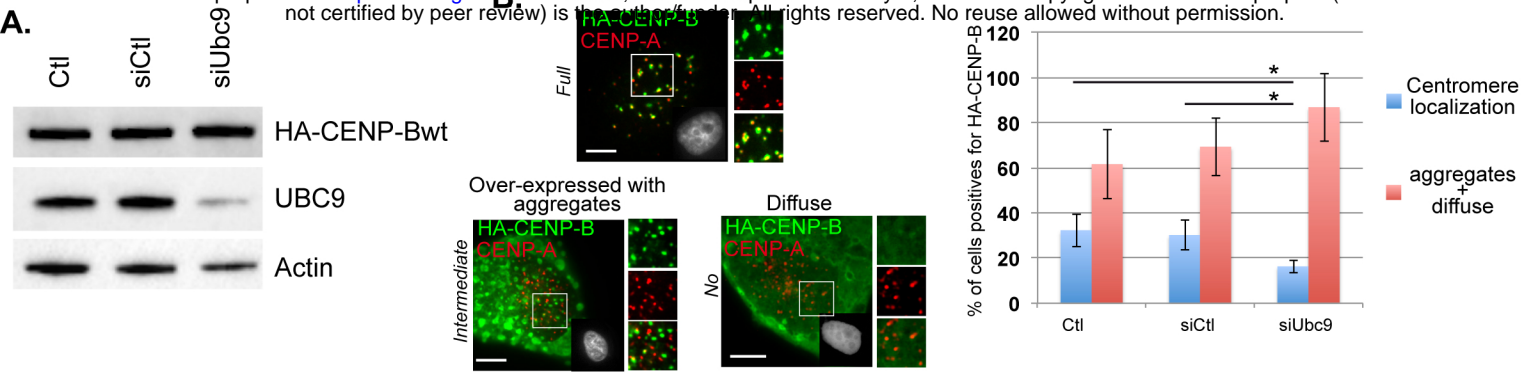

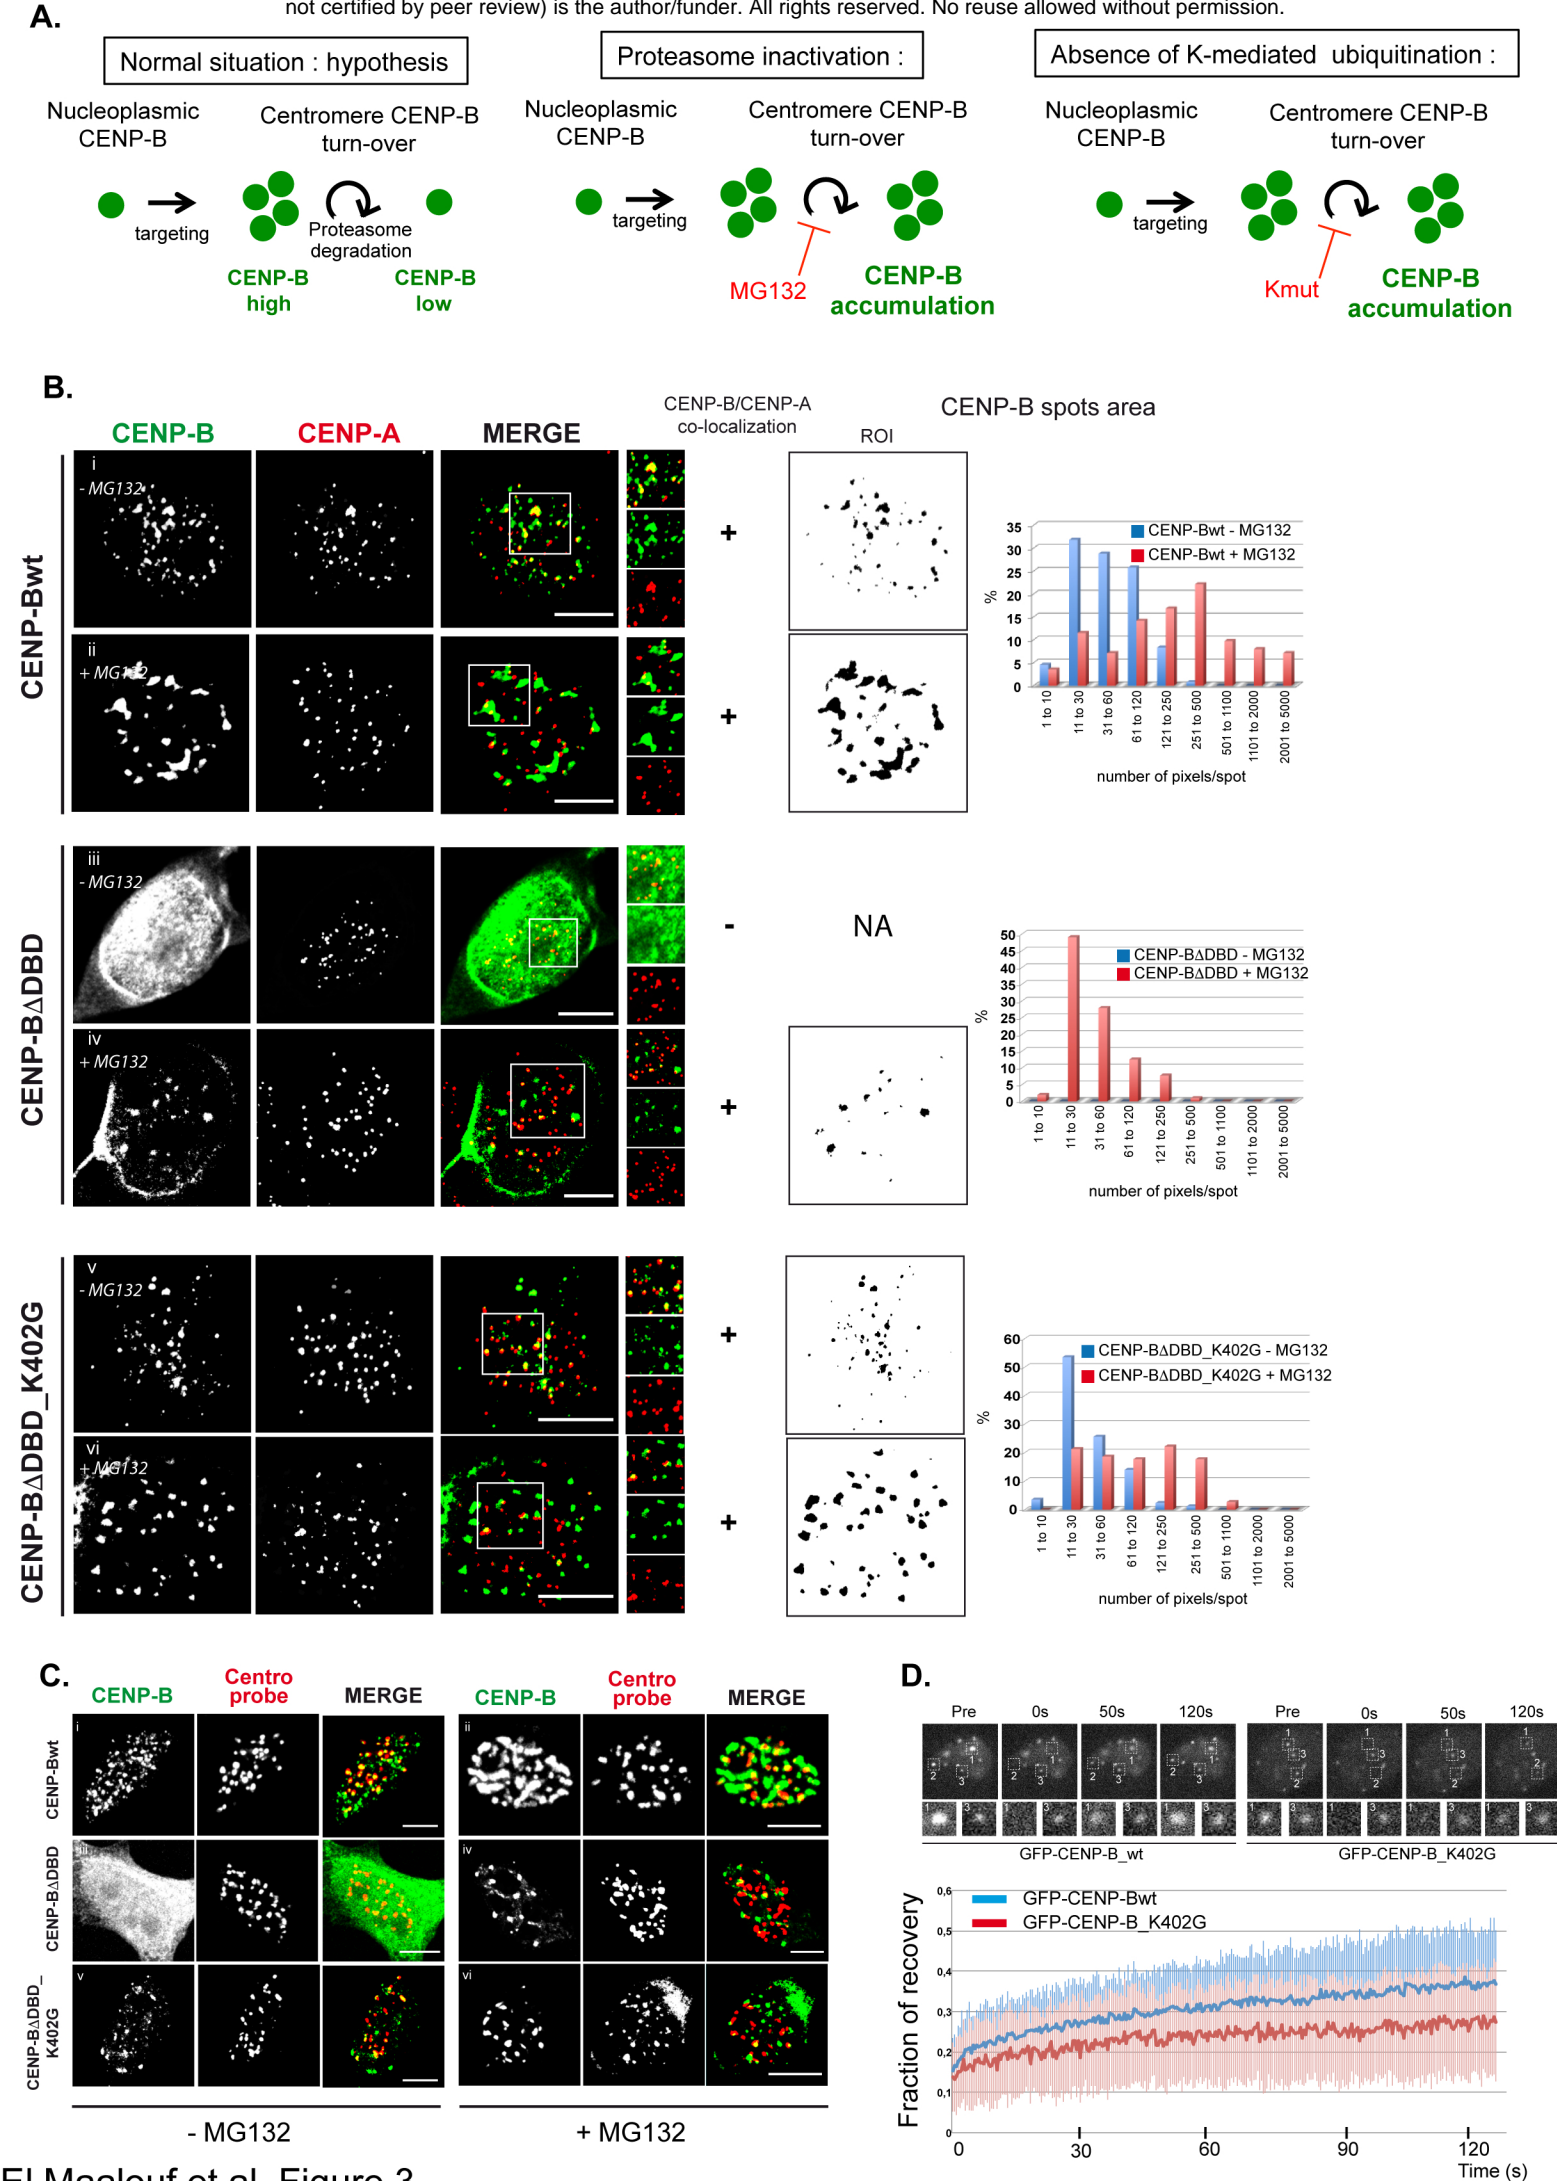

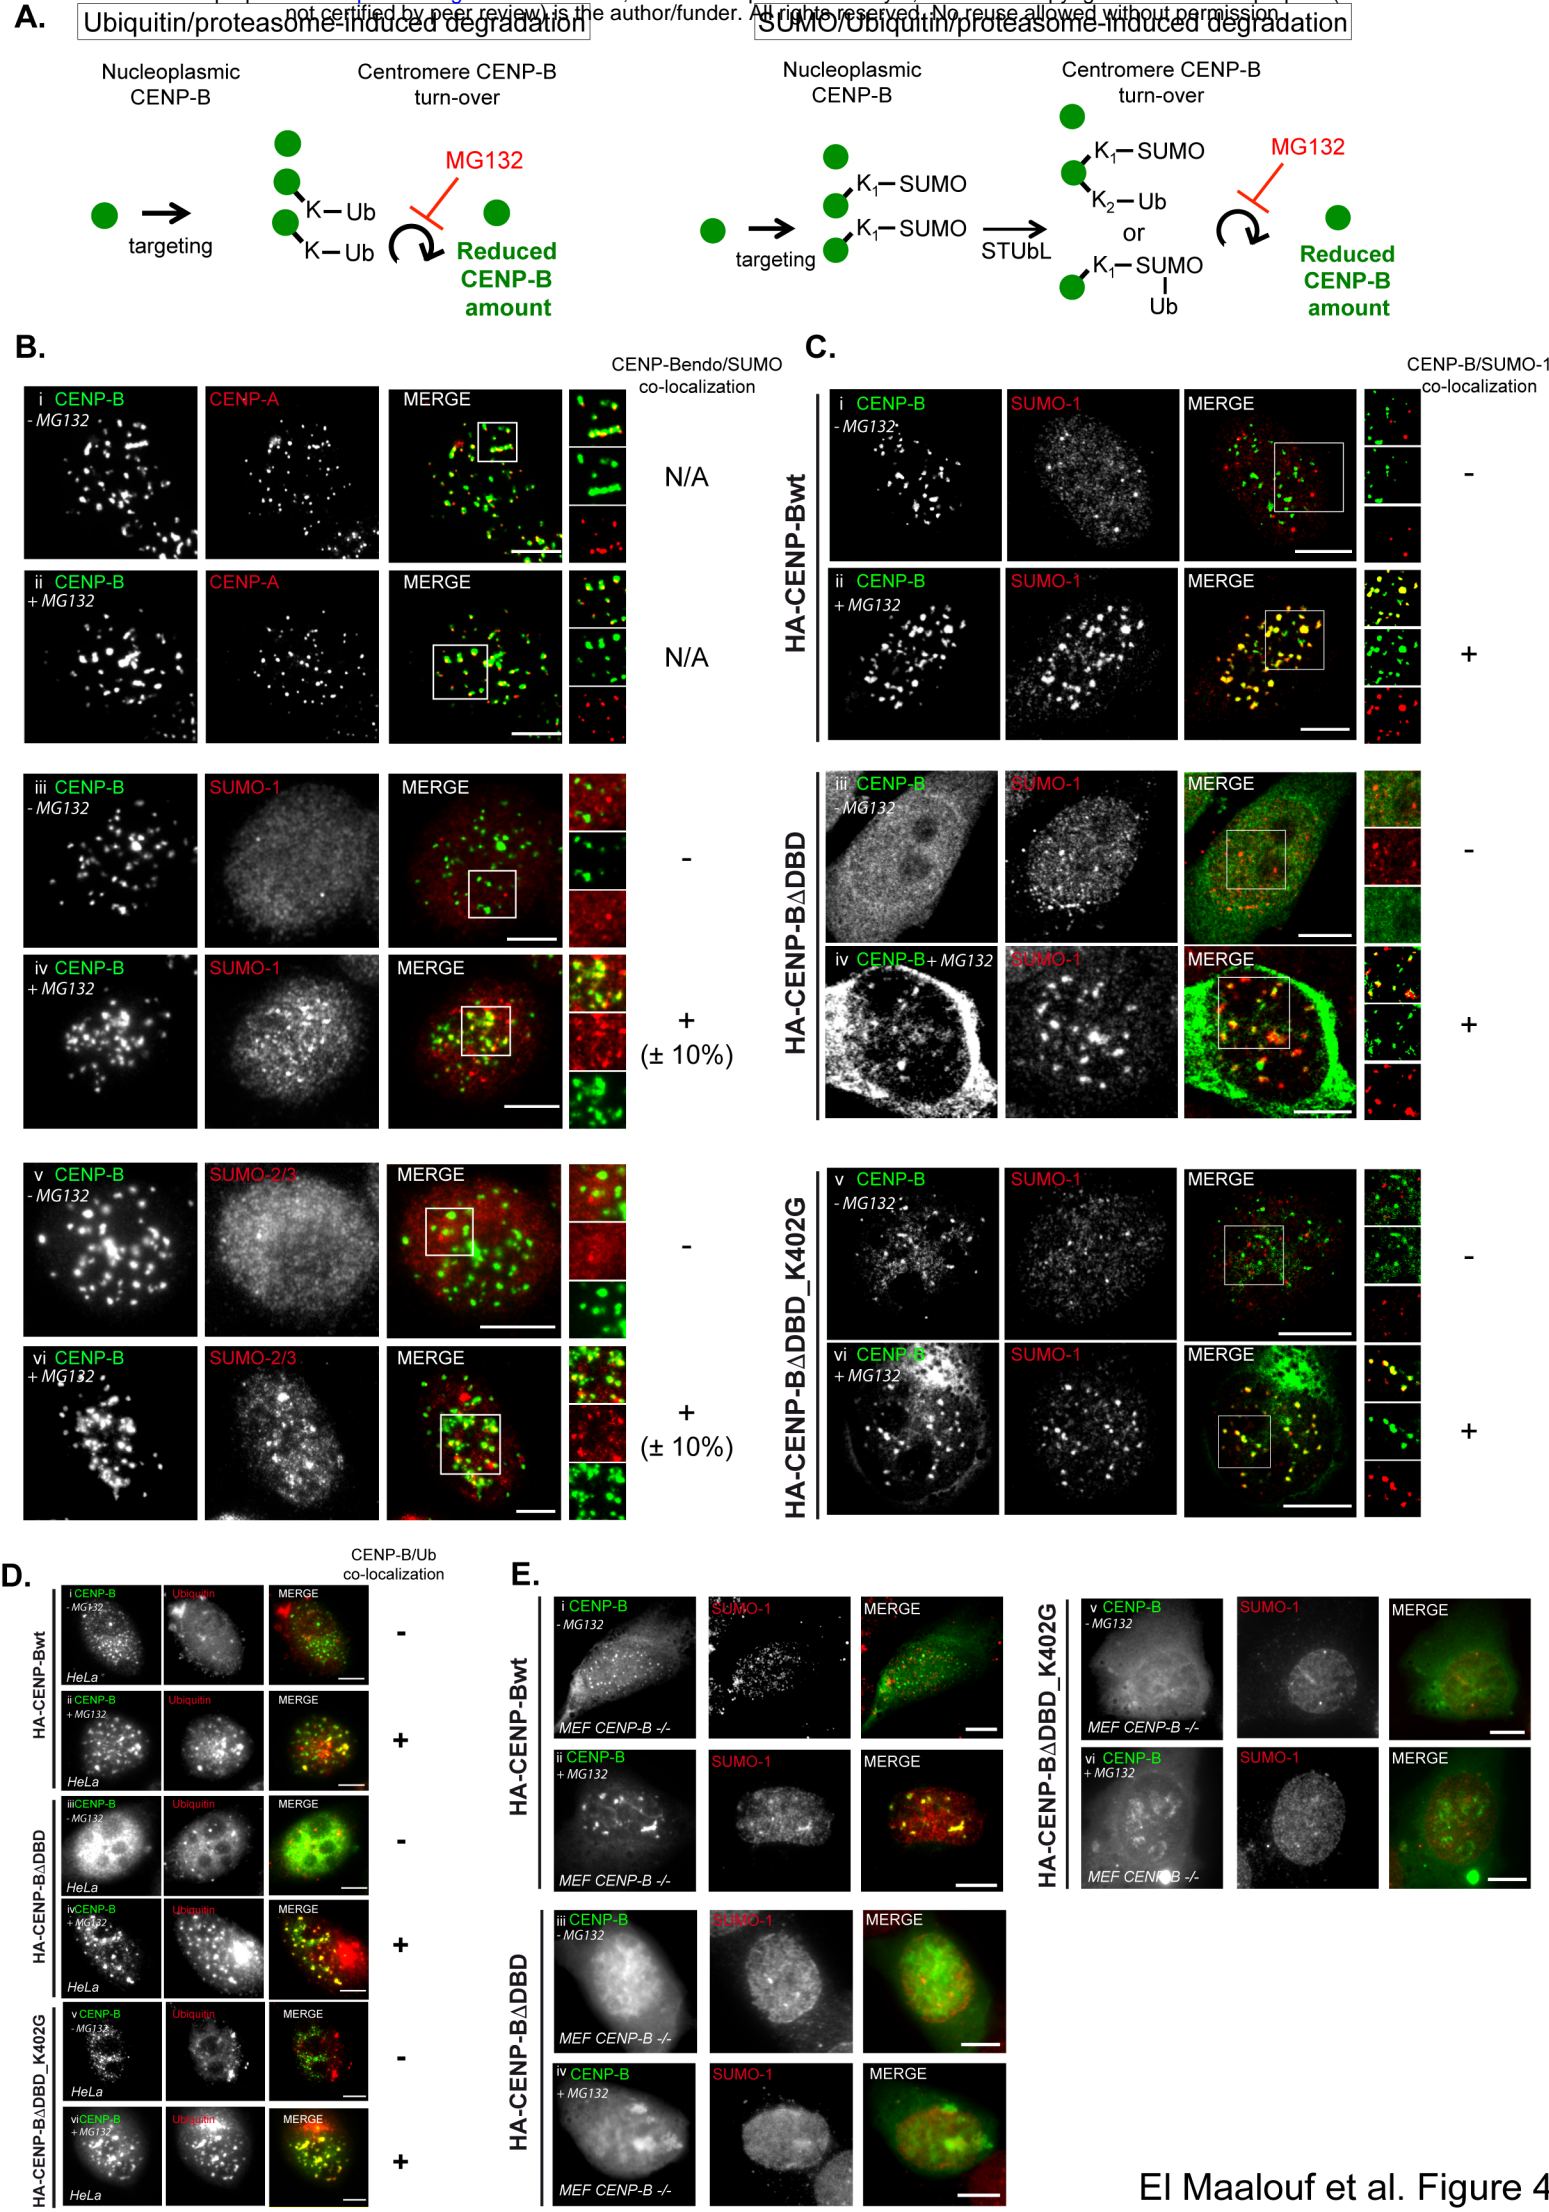



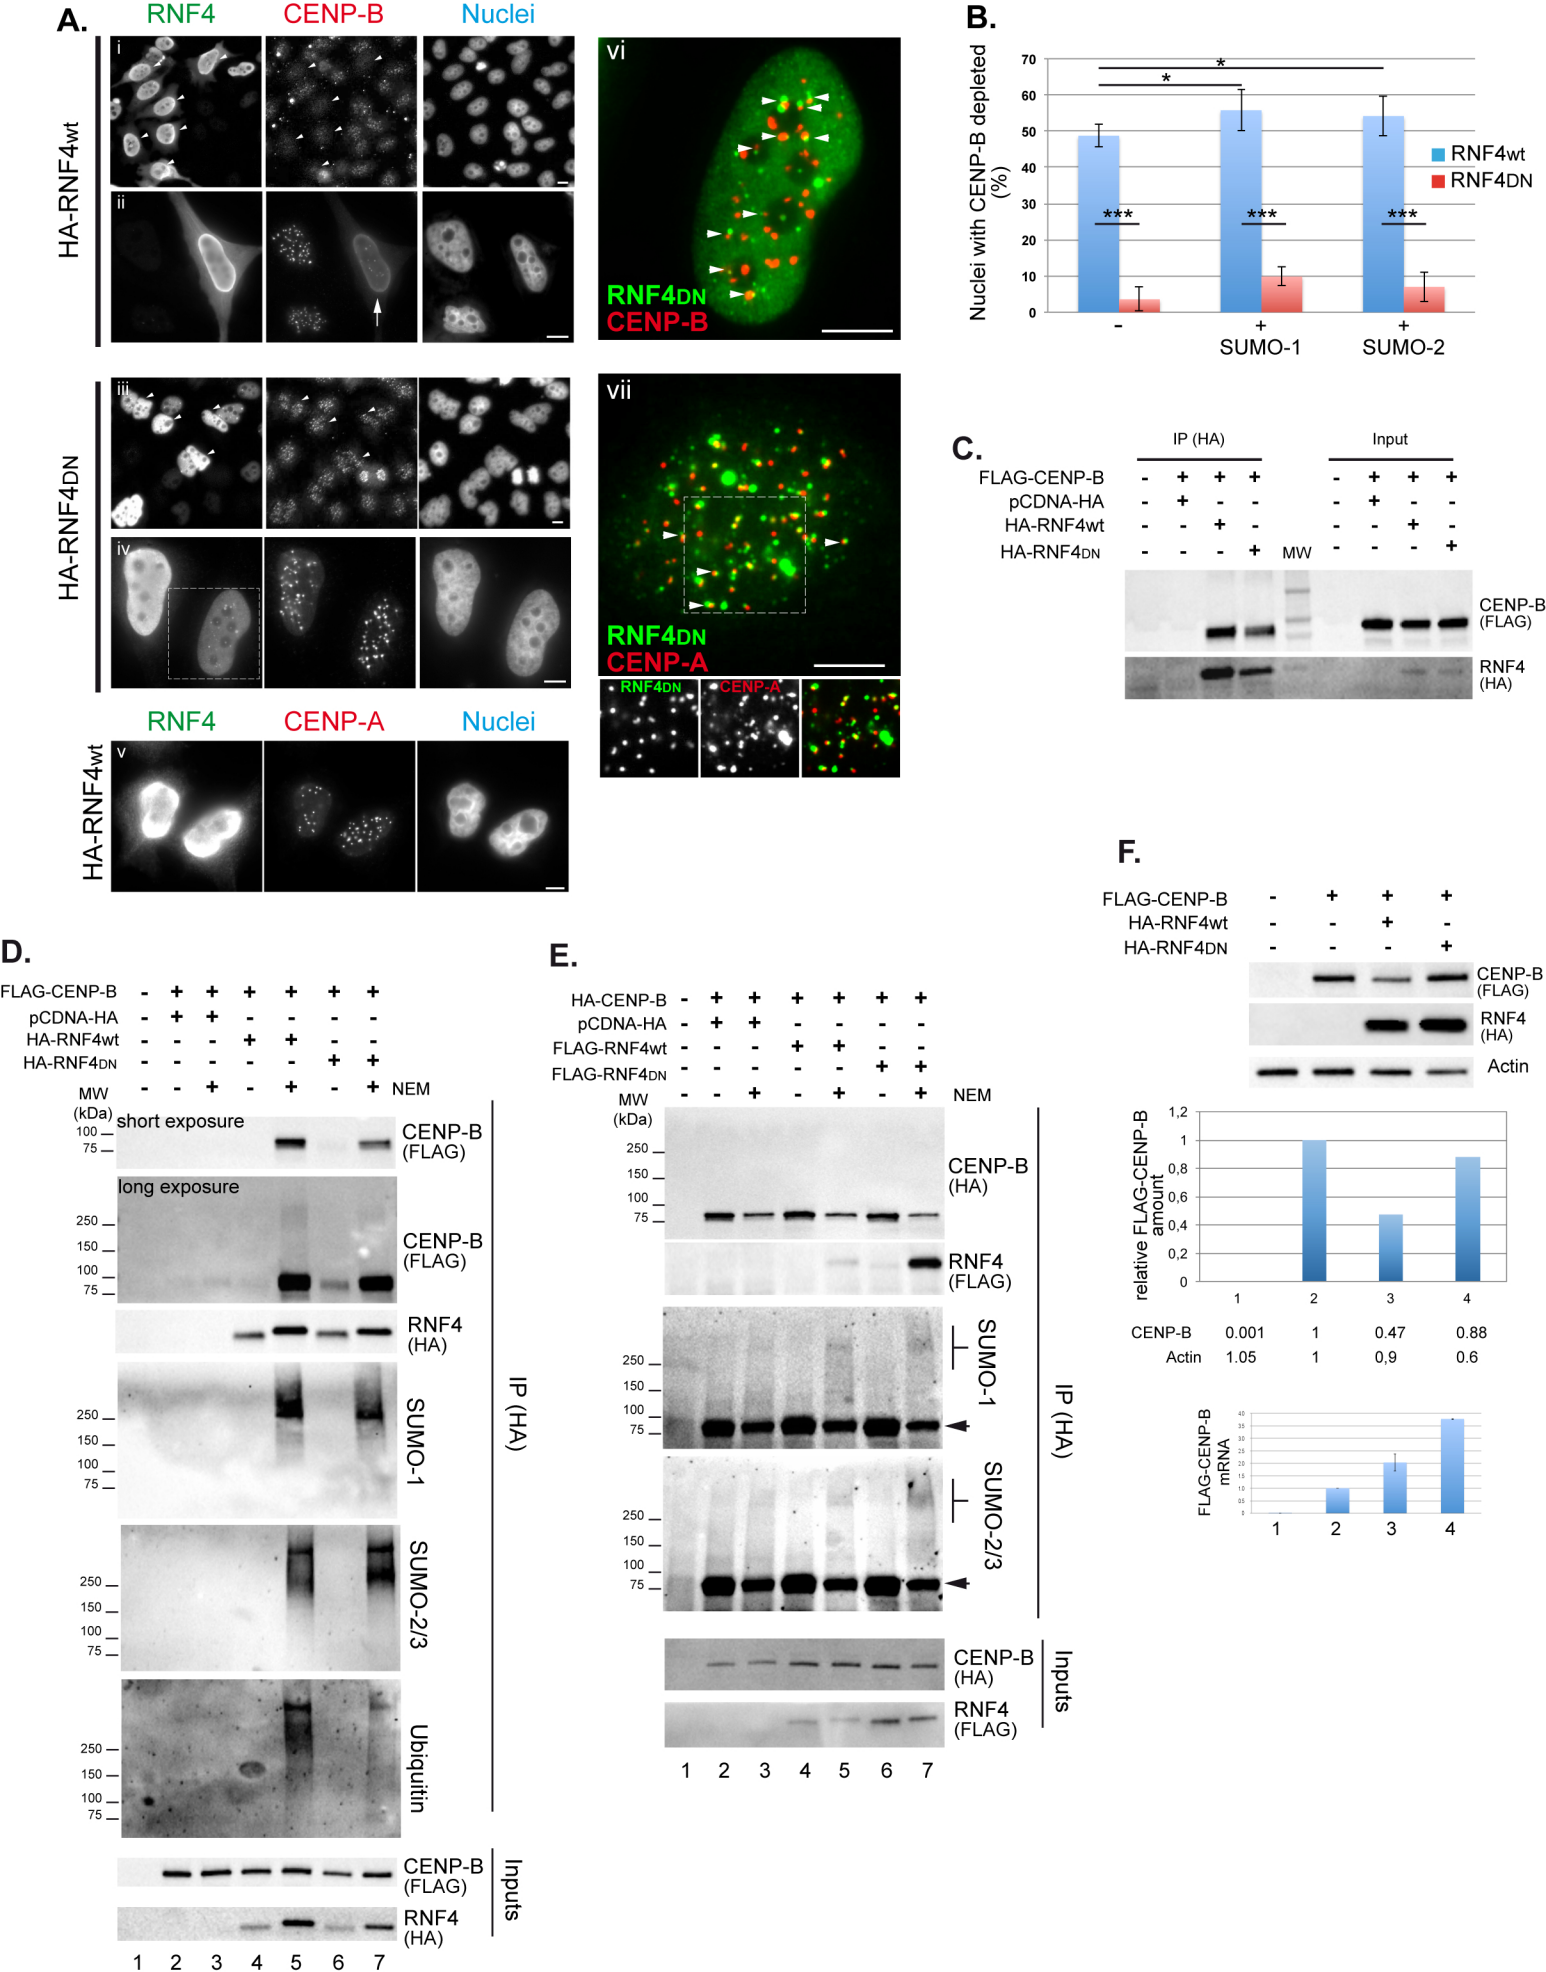

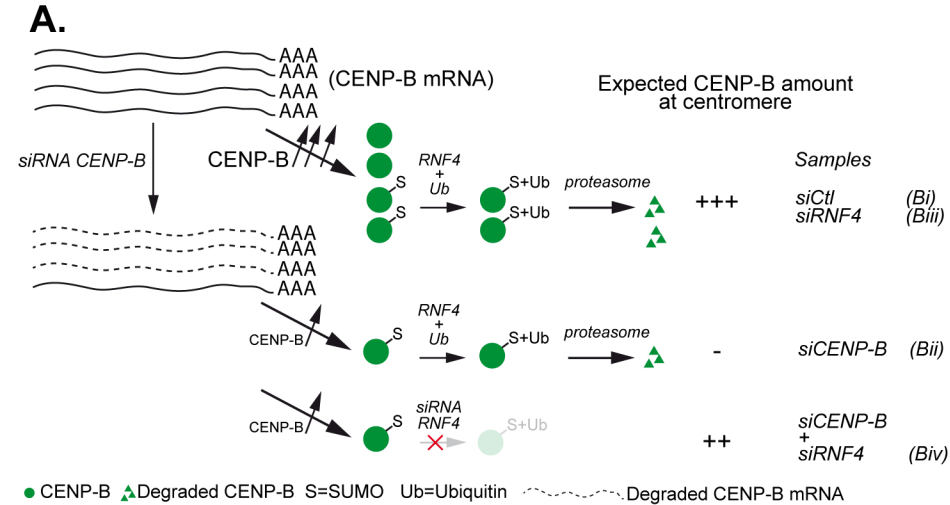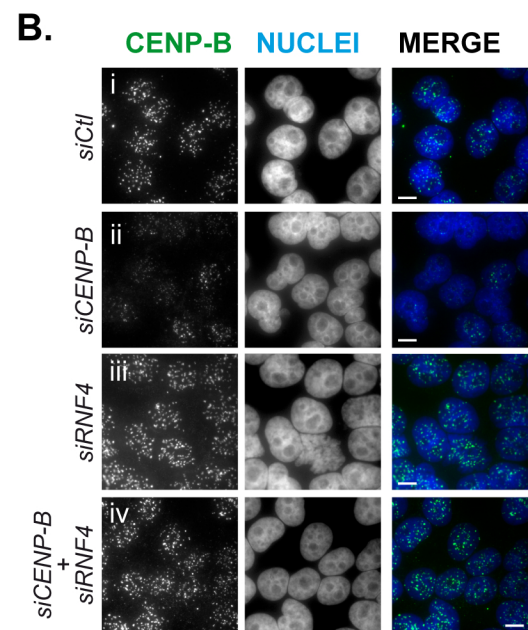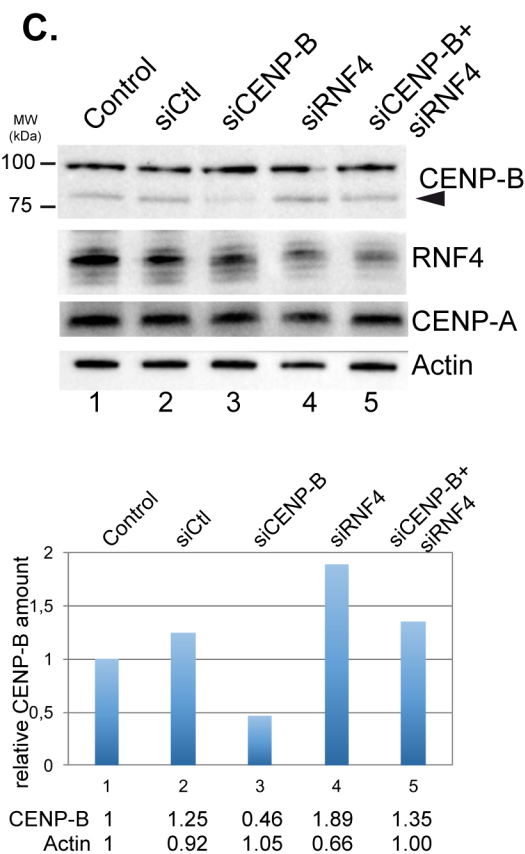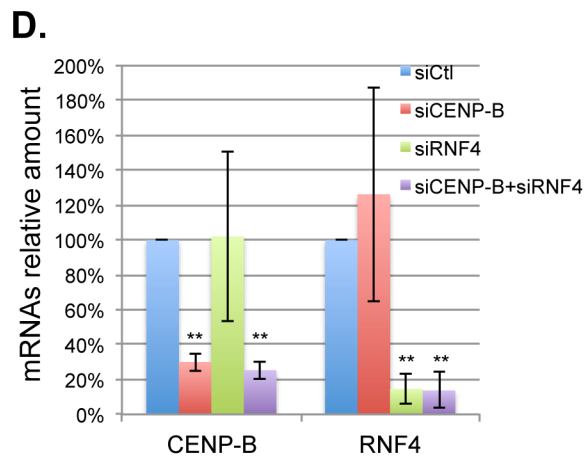

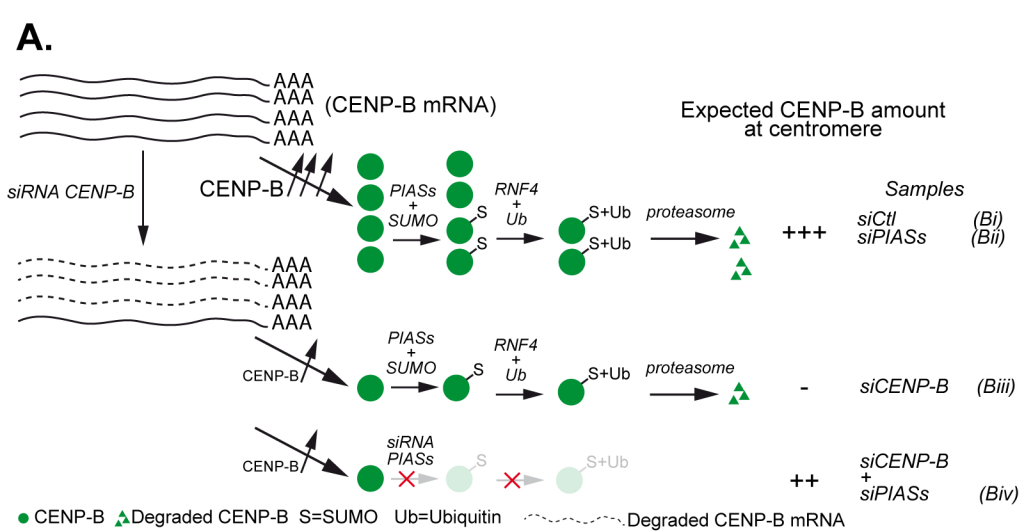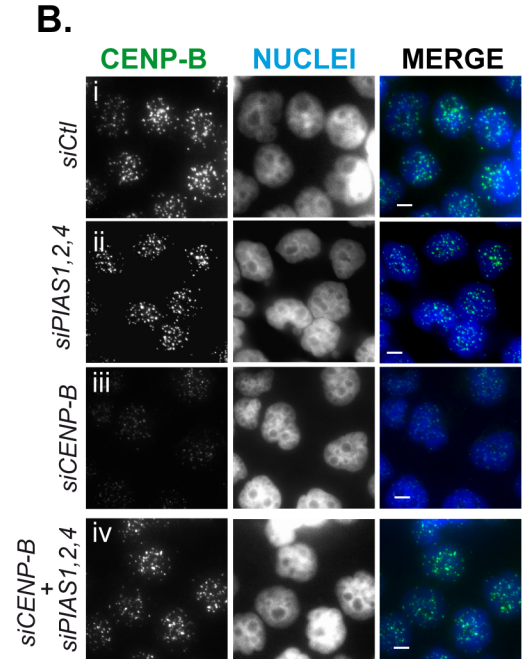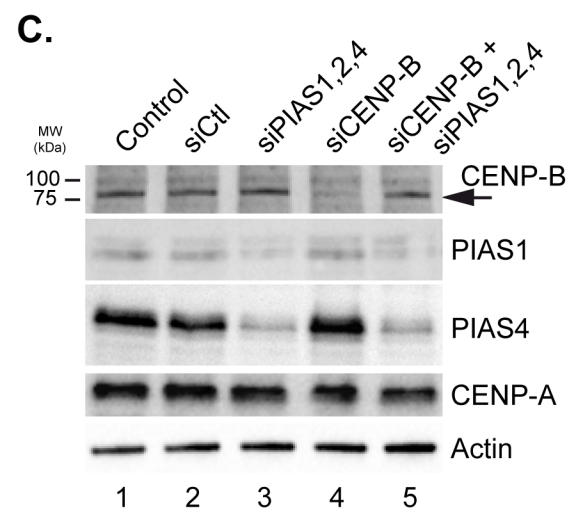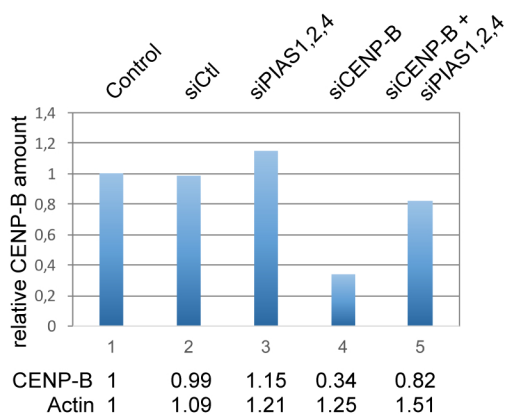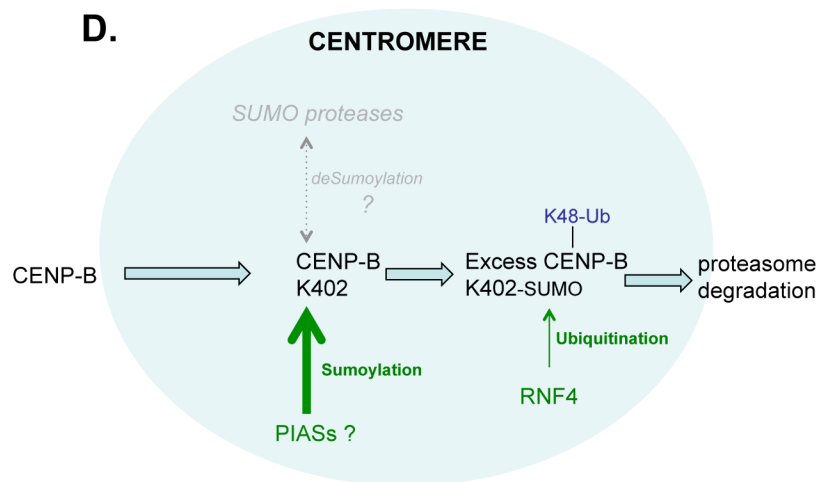

**A.**

|               |   |   |   |   |   |   |   |   |   |    |
|---------------|---|---|---|---|---|---|---|---|---|----|
| CENP-Bwt :    | - | - | + | + | - | - | - | - | - | -  |
| CENP-B_3K :   | - | - | - | - | + | + | - | - | - | -  |
| CENP-B_4K :   | - | - | - | - | - | - | + | + | - | -  |
| PML IV :      | - | - | - | - | - | - | - | - | + | +  |
| SAE1/2/Ubc9 : | + | + | + | + | + | + | + | + | + | +  |
| SUMO-1 :      | - | + | - | + | - | + | - | + | - | +  |
| Sample # :    | 1 | 2 | 3 | 4 | 5 | 6 | 7 | 8 | 9 | 10 |

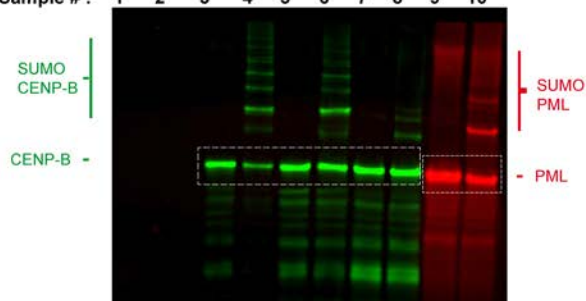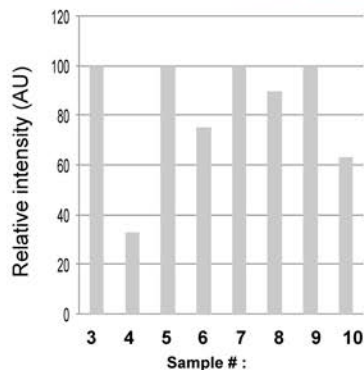**B.**

|                               |   |   |   |   |   |   |
|-------------------------------|---|---|---|---|---|---|
| CENP-Bwt :                    | + | + | - | - | - | - |
| CENP-B $\Delta$ DBD_K402mut : | - | - | + | + | - | - |
| CENP-B $\Delta$ DBD :         | - | - | - | - | + | + |
| SAE1/2/Ubc9 :                 | + | + | + | + | + | + |
| SUMO-1 :                      | - | + | - | + | - | + |
| Sample # :                    | 1 | 2 | 3 | 4 | 5 | 6 |

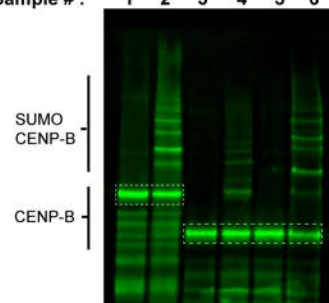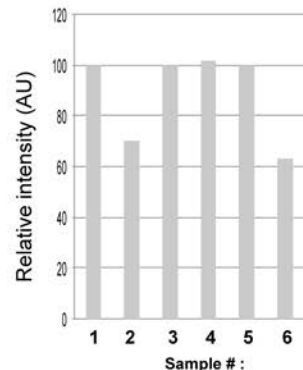

**A**

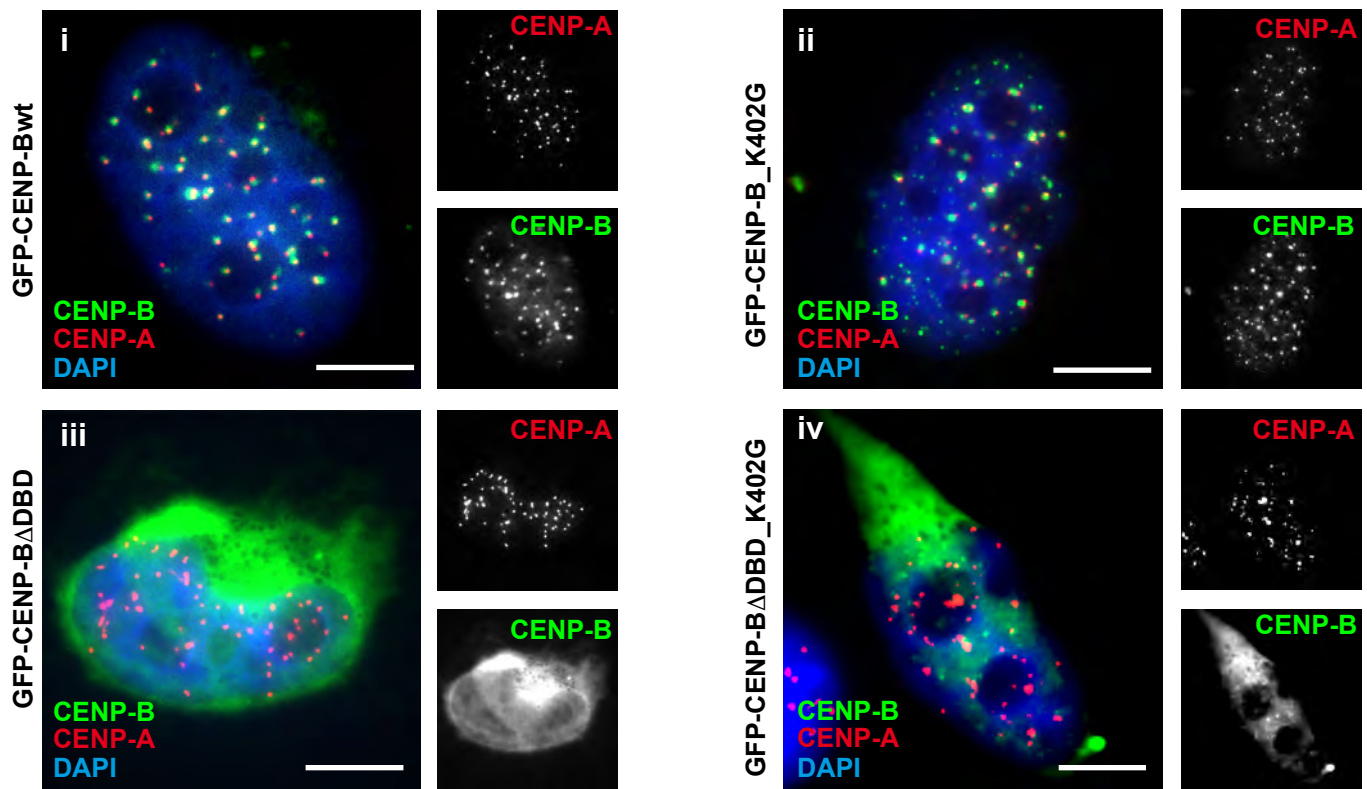

**B**

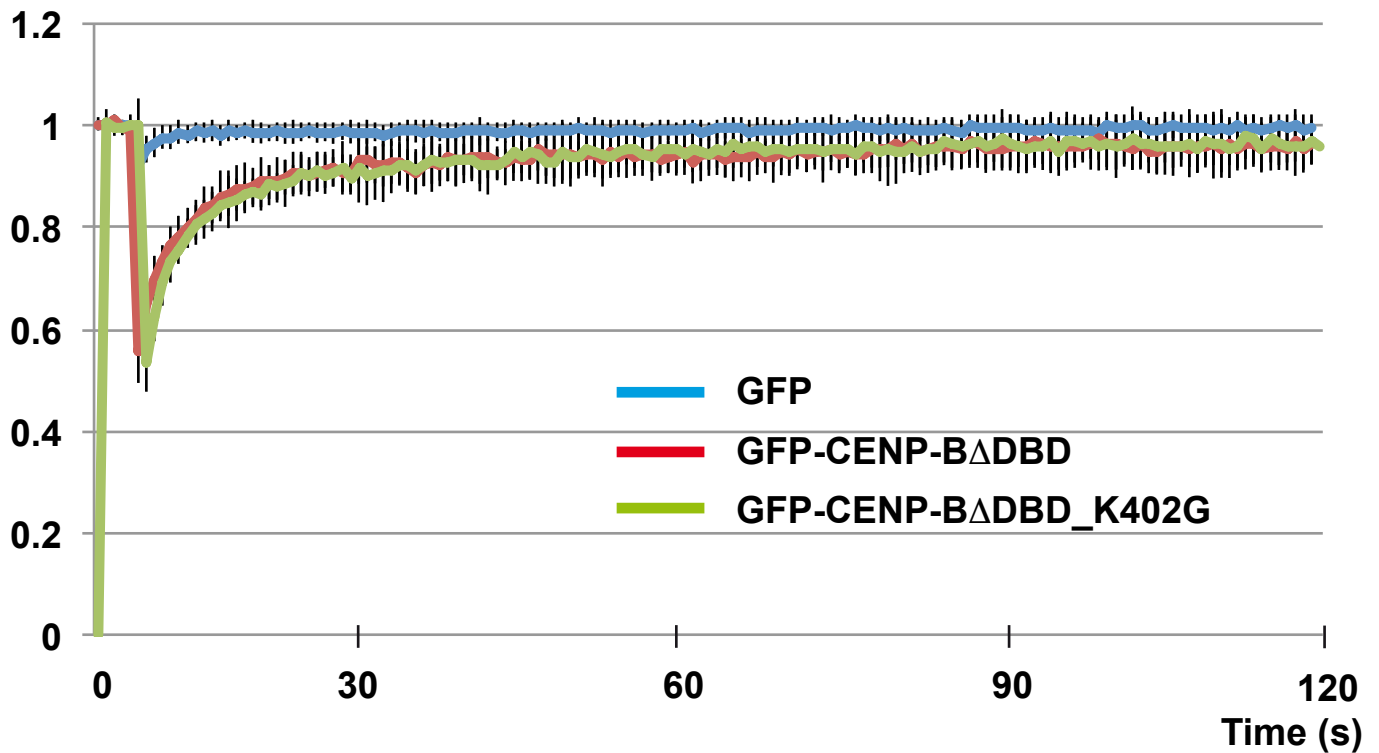

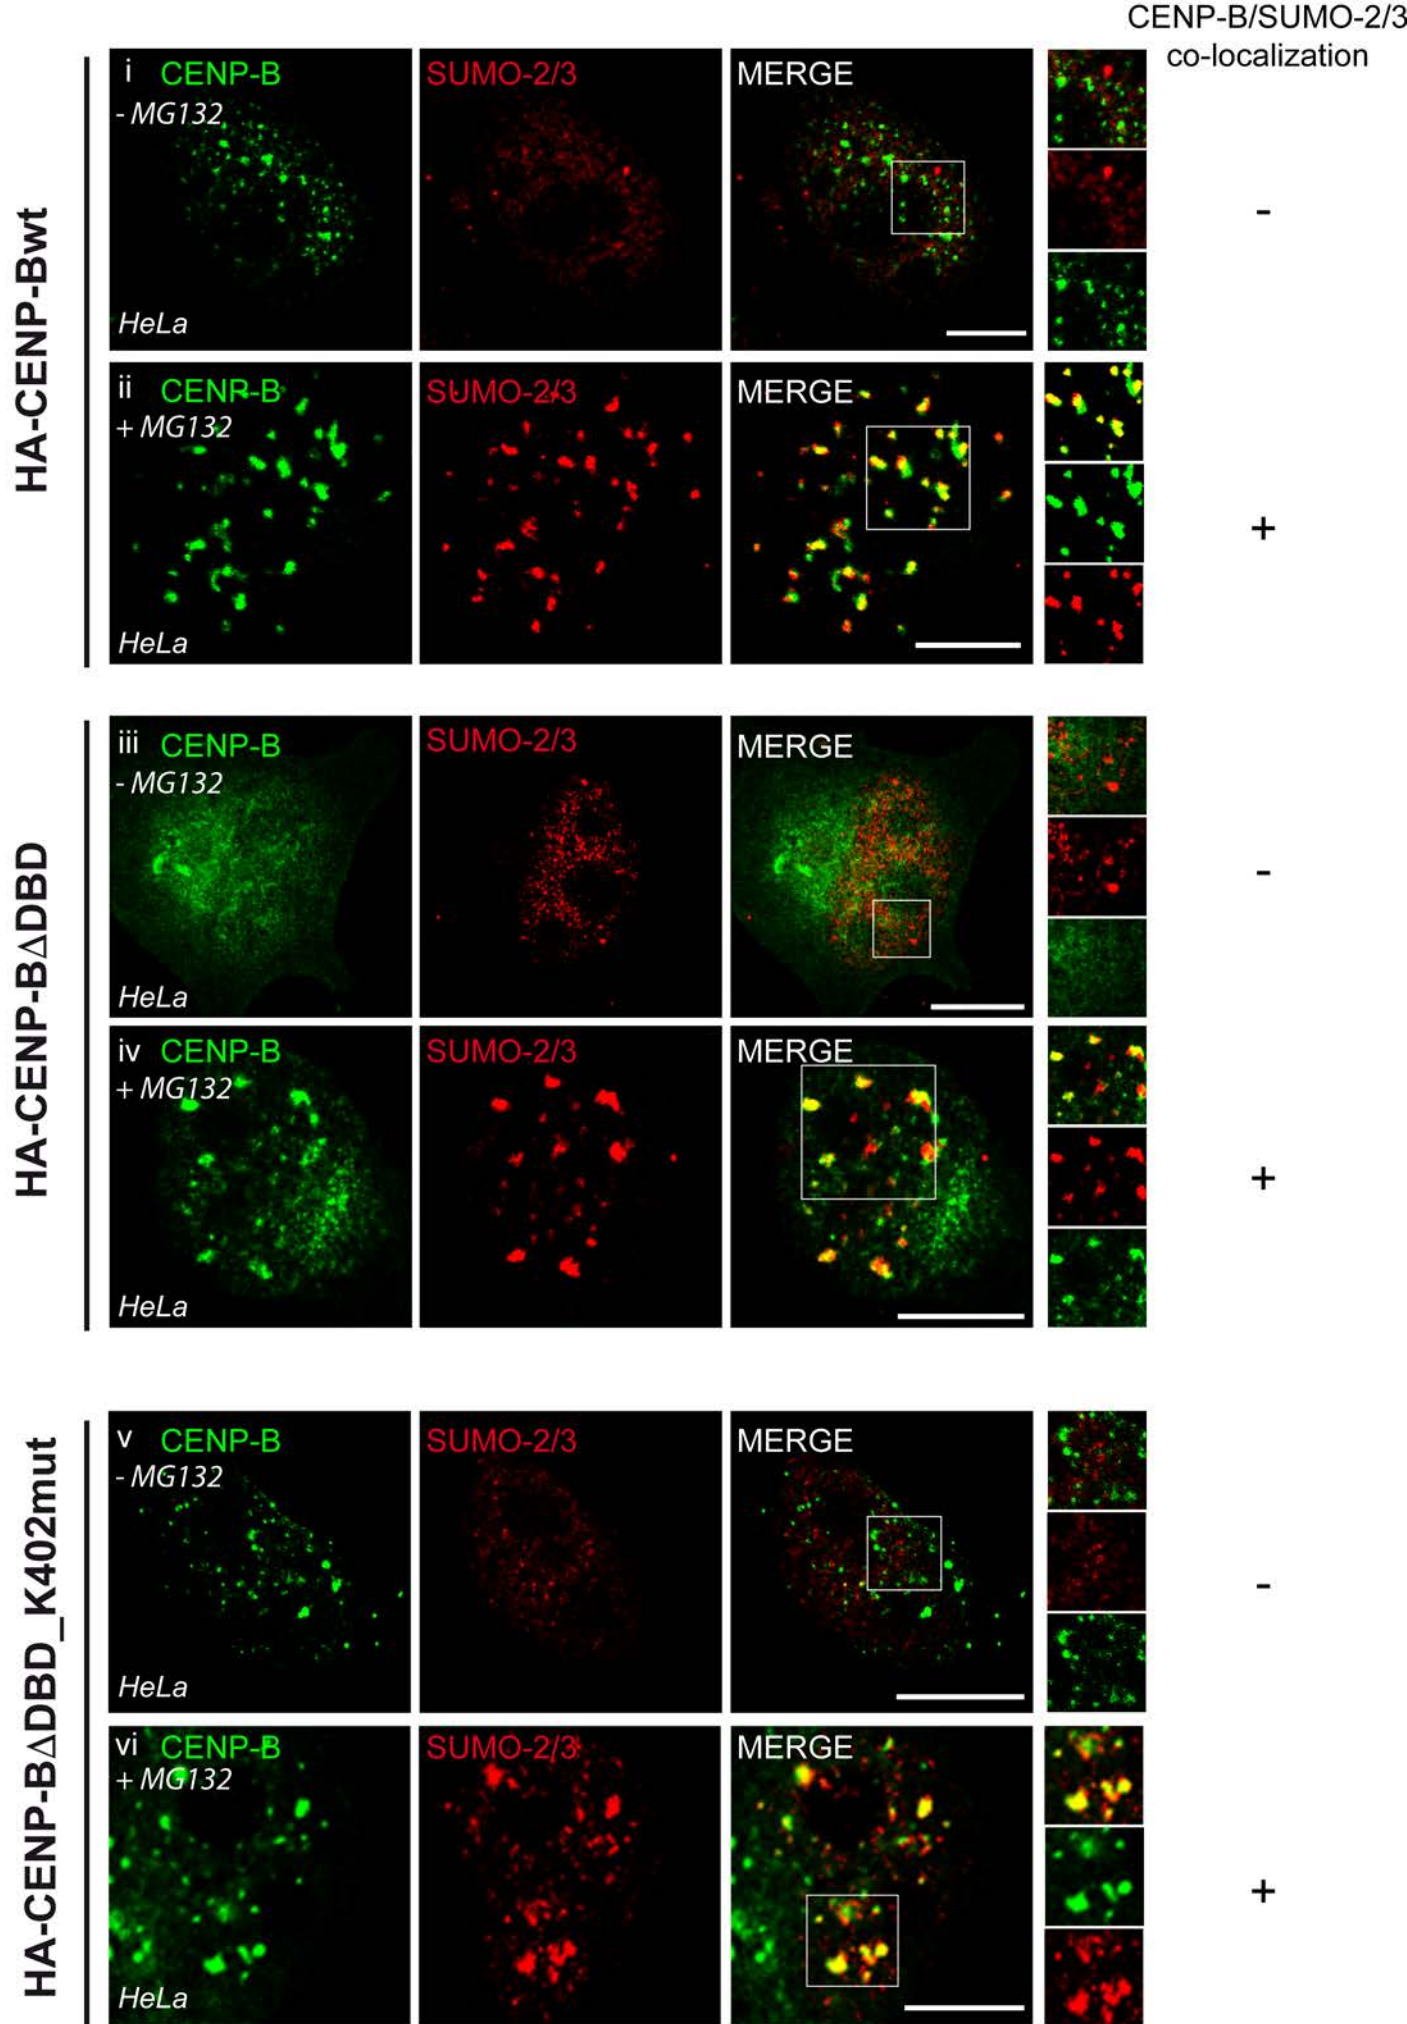

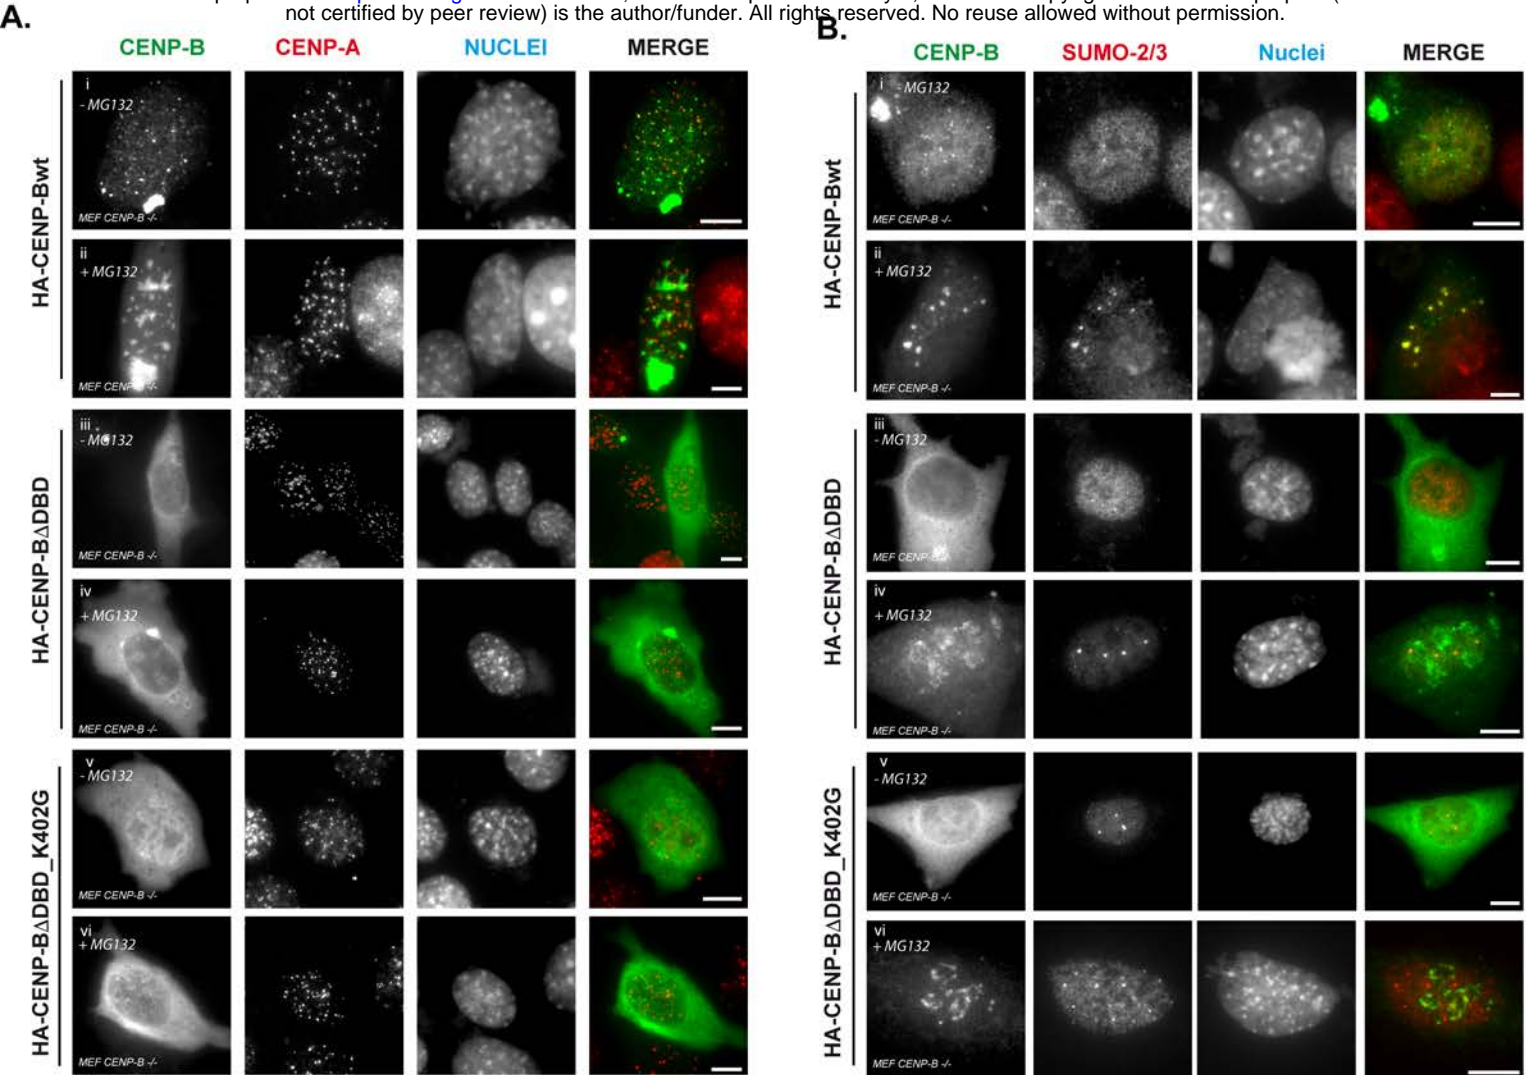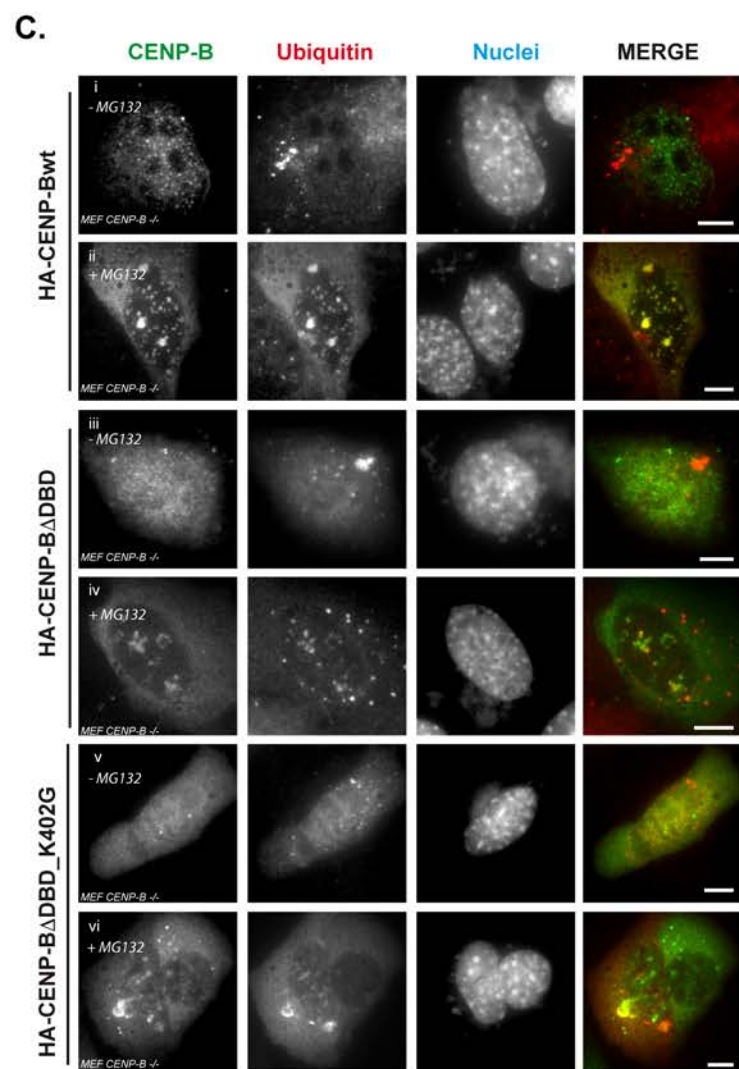

Source: https://www.biorxiv.org/content/10.1101/245597v1.full.pdf
